# Supplementary material for: l-Proline as an efficient enantioinduction organo-catalyst in the solvent-free synthesis of pyrazolo[3,4-b]quinoline derivatives via one-pot multi-component reaction
Source: Royal Society of Chemistry journal article supplement (doi:10.1039/c6ra22429f), 2016-01-01
Supplement: c6ra22429f1.pdf [file c6ra22429f1.pdf]

## Supporting Information

### **L-Proline as an efficient enantioinduction organo-catalyst in the solvent-free synthesis of pyrazolo[3,4-*b*]quinoline derivatives *via* one-pot multi-component reaction**

Deboshikha Bhattacharjee,<sup>a</sup> Baskhemlang Kshiar,<sup>a</sup> Bekington Myrboh<sup>a\*</sup>

<sup>a</sup>*Centre for Advanced Studies in Chemistry, Department of Chemistry, North-Eastern Hill University, Mawlai, Shillong -793022, India.*

\*Corresponding author: Prof. Bekington Myrboh; e-mail: [bmyrboh@nehu.ac.in](mailto:bmyrboh@nehu.ac.in); Centre for Advanced Studies in Chemistry, Department of Chemistry, North-Eastern Hill University, Mawlai, Shillong -793022, India.

| <b>Contents</b>                                               | <b>Pages</b> |
|---------------------------------------------------------------|--------------|
| 1. Experimental Section                                       | 2            |
| 2. Table 1. X-ray crystallography data for compound <b>4j</b> | 3            |
| 3. Analytical data                                            | 4-14         |
| 4. HPLC analysis                                              | 15-35        |
| 5. References                                                 | 36           |

## EXPERIMENTAL

All commercially available chemicals and reagents were purchased from Sigma Aldrich, Merck and were used without further purification. Purity of the products were confirmed by infrared (IR),  $^1\text{H-NMR}$ ,  $^{13}\text{C-NMR}$  and mass spectra. IR spectra were recorded in KBr pellets on a Perkin Elmer Spectrum 400 FTIR instrument, and the frequencies are expressed in  $\text{cm}^{-1}$ .  $^1\text{H-NMR}$  and  $^{13}\text{C-NMR}$  spectra were recorded on Bruker Avance II-400 spectrometer in  $\text{DMSO-d}_6$  (Chemical shifts in  $\delta$  with TMS as internal standard). Mass spectral data were obtained with a JEOL D-300 (ESI) mass spectrometer. All reactions were monitored by thin layer chromatography (TLC) using precoated aluminium sheets (silica gel 60 F<sub>254</sub> 0.2-mm thickness). HPLC analyses were performed on Waters M515 series equipped with a Agela chiral ADV analytical column (5  $\mu\text{m}$ , 1000  $\text{\AA}$ , 4.6x250 mm.). UV-detection at 254 nm was used to analyse the data. The analytical separation was carried out at 25°C using a mobile phase (A) of isopropanol and (B) of n-Hexane as eluent, the all solvents were HPLC-grade. TFA was of analytical grade. The flow rate applied was 0.5 mL/min.

### X-ray crystallography

The X-ray data of **4j** was collected at 293 K with a Agilent Xcalibur (Eos, Gemini) diffractometer using graphite-monochromated Mo-K $\alpha$  radiation ( $\lambda = 0.71073 \text{ \AA}$ ). The data was collected and reduced in CrysAlis PRO (Agilent, 2011) software and cell refinement was done in CrysAlis PRO software. The absorption was corrected by SCALE3 ABSPACK multi-scan method in CrysAlisPro. The structures were solved by direct methods using the program SHELXS-2013 and refined by full matrix least-squares calculations (F2) by using the SHELXL-2013 software. All non-H atoms were refined anisotropically against F2 for all reflections. All hydrogen atoms were placed at their calculated positions and refined isotropically. ORTEP image of **4j** is shown in Figure 1

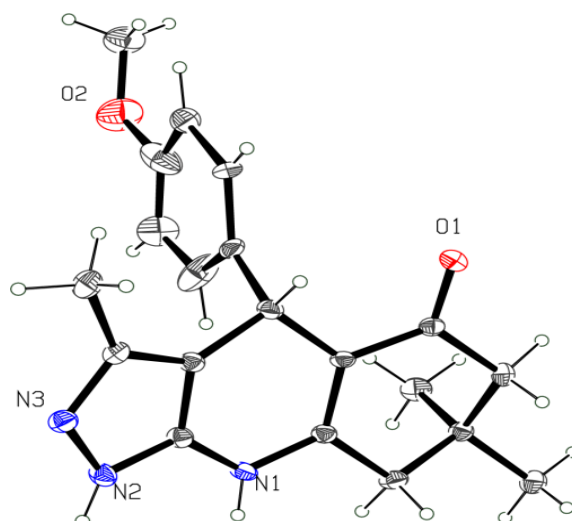

**Fig. 1.** ORTEP Image of **4j** (CCDC 1410800)

**Table 1.** X-ray crystallography data for compound **4j**

|                                   |                                                               |                              |
|-----------------------------------|---------------------------------------------------------------|------------------------------|
| Empirical formula                 | C <sub>20</sub> H <sub>23</sub> N <sub>3</sub> O <sub>2</sub> |                              |
| Formula weight                    | 337.41                                                        |                              |
| Temperature                       | 293(2) K                                                      |                              |
| Wavelength                        | 0.71073 Å                                                     |                              |
| Crystal system                    | Monoclinic                                                    |                              |
| Space group                       | P 21/n                                                        |                              |
| Unit cell dimensions              | a = 8.7142(7) Å                                               | $\alpha = 90^\circ$ .        |
|                                   | b = 14.7858(8) Å                                              | $\beta = 106.346(7)^\circ$ . |
|                                   | c = 14.5751(9) Å                                              | $\alpha = 90^\circ$ .        |
| Volume                            | 1.802(2) nm <sup>3</sup>                                      |                              |
| Z                                 | 4                                                             |                              |
| Density (calculated)              | 1.244 Mg/m <sup>3</sup>                                       |                              |
| Absorption coefficient            | 0.082 mm <sup>-1</sup>                                        |                              |
| F(000)                            | 720                                                           |                              |
| Theta range for data collection   | 3.117 to 26.370°.                                             |                              |
| Index ranges                      | -10 ≤ h ≤ 10, -14 ≤ k ≤ 18, -13 ≤ l ≤ 18                      |                              |
| Reflections collected             | 7891                                                          |                              |
| Independent reflections           | 3566 [R(int) = 0.0339]                                        |                              |
| Refinement method                 | Full-matrix least-squares on F <sup>2</sup>                   |                              |
| Data / restraints / parameters    | 3566 / 0 / 234                                                |                              |
| Goodness-of-fit on F <sup>2</sup> | 1.407                                                         |                              |
| Final R indices [I > 2σ(I)]       | R1 = 0.1321, wR2 = 0.3486                                     |                              |
| R indices (all data)              | R1 = 0.1686, wR2 = 0.3845                                     |                              |

### General procedure for the synthesis of 4 (a–u)

A pre-stirred mixture of aldehyde 1 (2.1 mmol), dimedone 2 (2.0 mmol) and 3-methyl-1H-pyrazol-5-amine 3 (2.0 mmol) was irradiated in a Chem Discover microwave reactor at 110°C, for 15 min, in the presence of L-proline (10 mol %). The completion of the reaction was monitored by TLC. After the completion of the reaction, it was worked up using ethyl acetate, washed with brine. The organic layer was dried over anhydrous Na<sub>2</sub>SO<sub>4</sub> and concentrated in vacuo to give the crude mass. The crude compound was then purified by silica gel column chromatography to afford the pyrazoloquinolinones 4 in pure form.

### Analytical data for the substituted pyrazolo derivative derivatives

*4-(4-chlorophenyl)-3,7,7-trimethyl-6,7,8,9-tetrahydro-1H-pyrazolo[3,4-b]quinolin-5(4H)-one, (4a).*

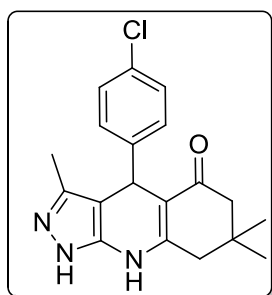

White solid. mp : 305-306 °C. IR  $\nu_{\max}$  (KBr): 3258, 3073, 2952, 1573, 1547, 1255, 770 cm<sup>-1</sup>; <sup>1</sup>H NMR (400 MHz, DMSO-*d*<sub>6</sub>):  $\delta_{\text{H}}$  (ppm) 0.67 (s, 3H, CH<sub>3</sub>), 0.76 (s, 3H, CH<sub>3</sub>), 1.85(s, 3H, CH<sub>3</sub>), 2.17-2.30 (m, 2H, CH<sub>2</sub>), 5.32 (s, 1H, 4H), 5.81(s,1 H, NH), 6.86 (d, 2H, *J* = 8 Hz, Ar-H), 7.07 (d, 2H, *J* = 8 Hz, Ar-H), 10.19 (s, 1H, NH); <sup>13</sup>C NMR (100 MHz, ACETONE-*d*<sub>6</sub>):  $\delta_{\text{C}}$  (ppm) 14.21, 27.46, 29.34, 32.86, 33.12 40.98, 50.93, 106.00, 113.08, 128.63, 128.87, 129.58, 132.99, 143.46, 149.28, 150.31, 193.40 ; MS (ES<sup>+</sup>) : calcd for C<sub>19</sub>H<sub>20</sub>ClN<sub>3</sub>O 341.13 found *m/z* 342.40 (M + H)<sup>+</sup>.

**4-(2-chlorophenyl)-3,7,7-trimethyl-6,7,8,9-tetrahydro-1H-pyrazolo[3,4-b]quinolin-5(4H)-one, (4b)**

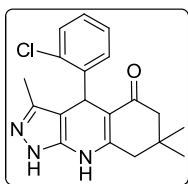

White solid. mp : 302-304 °C. IR  $\nu_{\max}$  (KBr): 3258, 3067, 2957, 1579, 1548, 1257, 748  $\text{cm}^{-1}$ ;  $^1\text{H}$  NMR (400 MHz,  $\text{CDCl}_3$ ):  $\delta_{\text{H}}$  (ppm) 0.99(s, 3H,  $\text{CH}_3$ ), 1.04 (s, 3H,  $\text{CH}_3$ ), 1.91(s, 3H,  $\text{CH}_3$ ), 2.11 (d, 1H,  $J = 16$  Hz,  $\text{CH}_2$ ), 2.18 (d, 1H,  $J = 16$  Hz,  $\text{CH}_2$ ), 2.38-2.60(m, 2H,  $\text{CH}_2$ ), 4.06 (s, 1H, NH), 5.46 (s, 1H, 4H), 7.00-7.57 (m, 4H, Ar-H) 11.55 (s, 1H, NH);  $^{13}\text{C}$  NMR (100 MHz,  $\text{CDCl}_3 + \text{DMSO-}D_6$ ):  $\delta_{\text{C}}$  (ppm) 13.53, 26.28, 26.85, 28.59, 31.91, 41.24, 49.87, 106.84, 113.07, 126.13, 128.08, 129.28, 130.10, 137.29, 139.96, 144.17, 149.24, 154.66, 193.84; MS ( $\text{ES}^+$ ) calcd for  $\text{C}_{19}\text{H}_{20}\text{ClN}_3\text{O}$  341.13 found  $m/z$  342.40 ( $\text{M} + \text{H}$ ) $^+$ .

**4-(4-bromophenyl)-3,7,7-trimethyl-6,7,8,9-tetrahydro-1H-pyrazolo[3,4-b]quinolin-5(4H)-one, (4c)**

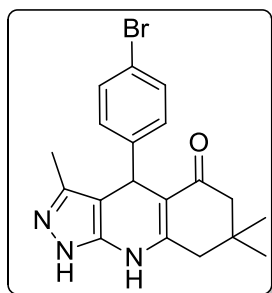

White solid. mp : 314-315 °C. IR  $\nu_{\max}$  (KBr): 3235, 3125, 2954, 1578, 1548, 1252, 796  $\text{cm}^{-1}$ ;  $^1\text{H}$  NMR (400 MHz,  $\text{CDCl}_3$ ):  $\delta_{\text{H}}$  (ppm) 0.98 (s, 3H,  $\text{CH}_3$ ), 1.09 (s, 3H,  $\text{CH}_3$ ), 2.05-2.07 (m, 2H,  $\text{CH}_2$ ), 2.17 (s, 3H,  $\text{CH}_3$ ), 2.22 (d, 1H,  $J = 16$  Hz,  $\text{CH}_2$ ), 2.34 (d, 1H,  $J = 16$  Hz,  $\text{CH}_2$ ), 5.47 (s, 1H, 4H), 6.30 (s, 1H, NH), 7.09 (d, 2H,  $J = 8$  Hz, Ar-H), 7.38 (d, 2H,  $J = 8$  Hz, Ar-H), 7.75 (s, 1H, NH);  $^{13}\text{C}$  NMR (100 MHz,  $\text{CDCl}_3$ ):  $\delta_{\text{C}}$  (ppm) 14.52, 26.08, 27.52, 32.11, 34.03, 39.40, 55.74, 109.36, 112.77, 117.98, 128.28, 131.35, 133.19, 145.65, 146.27, 151.31, 198.62; MS ( $\text{ES}^+$ ) calcd  $\text{C}_{19}\text{H}_{20}\text{BrN}_3\text{O}$  385.08 found  $m/z$  386.20 ( $\text{M} + \text{H}$ ) $^+$ .

**4-(3-bromophenyl)-3,7,7-trimethyl-6,7,8,9-tetrahydro-1H-pyrazolo[3,4-b]quinolin-5(4H)-one, (4d)**

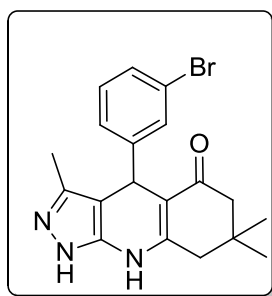

White solid. mp : 315-317 °C. IR  $\nu_{\max}$  (KBr): 3271, 3067, 2956, 1578, 1540, 1247, 753  $\text{cm}^{-1}$ ;  $^1\text{H}$  NMR (400 MHz, ACETONE- $\text{D}_6$ ):  $\delta_{\text{H}}$  (ppm) 0.74 (s, 3H,  $\text{CH}_3$ ), 0.86 (s, 3H,  $\text{CH}_3$ ), 1.82 (s, 3H,  $\text{CH}_3$ ), 1.96 (d, 1H,  $J = 16$  Hz,  $\text{CH}_2$ ), 2.04 (d, 1H,  $J = 16$  Hz,  $\text{CH}_2$ ), 2.31 (d, 1H,  $J = 16$  Hz,  $\text{CH}_2$ ), 2.37 (d, 1H,  $J = 16$  Hz,  $\text{CH}_2$ ), 4.05 (s, 1H, NH), 5.30 (s, 1H, 4H), 5.94 (s, 1H, NH), 7.07 (d, 1H,  $J = 8$  Hz, Ar-H), 7.16 (t, 1H, Ar-H), 7.22 (d, 1H,  $J = 8$  Hz, Ar-H), 7.82 (s, 1H, Ar-H);  $^{13}\text{C}$  NMR (100 MHz,  $\text{CDCl}_3$ ):  $\delta_{\text{C}}$  (ppm) 13.94, 27.42, 28.96, 29.70, 32.72, 41.09, 50.26, 101.09, 113.73, 119.17, 125.87, 129.71, 130.65, 134.01, 144.49, 148.05, 149.67, 154.88, 197.73; MS ( $\text{ES}^+$ ) calcd  $\text{C}_{19}\text{H}_{20}\text{BrN}_3\text{O}$  385.08 found  $m/z$  386.08 ( $\text{M} + \text{H}$ ) $^+$ .

**4-(4-fluorophenyl)-3,7,7-trimethyl-6,7,8,9-tetrahydro-1H-pyrazolo[3,4-b]quinolin-5(4H)-one, (4e)**

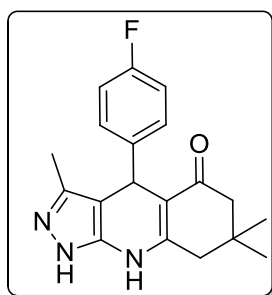

Yellowish solid. mp : 339-341 °C. IR  $\nu_{\max}$  (KBr): 3259, 3069, 2960, 1580, 1508, 1252, 757,  $\text{cm}^{-1}$ ;  $^1\text{H}$  NMR (400 MHz,  $\text{CDCl}_3$ ):  $\delta_{\text{H}}$  (ppm) 0.93 (s, 3H,  $\text{CH}_3$ ), 1.01 (s, 3H,  $\text{CH}_3$ ), 1.89 (s, 3H,  $\text{CH}_3$ ), 2.05 (d, 1H,  $J = 16$  Hz,  $\text{CH}_2$ ), 2.15 (d, 1H,  $J = 16$  Hz,  $\text{CH}_2$ ), 2.27-2.30 (m, 2H,  $\text{CH}_2$ ), 5.38 (s, 1H, 4H), 6.25 (s, H, NH), 6.81-7.12 (m, 4H, Ar-H), 11.83 (s, 1H, NH);  $^{13}\text{C}$  NMR (100 MHz,  $\text{CDCl}_3 + \text{DMSO-d}_6$ ):  $\delta_{\text{C}}$  (ppm) 14.47, 25.95, 27.32, 32.02, 34.30, 39.69, 51.57, 110.28, 114.92, 119.47, 128.62, 133.34, 140.36, 142.59, 153.33, 157.88, 197.72 ; MS ( $\text{ES}^+$ ) calcd  $\text{C}_{19}\text{H}_{20}\text{FN}_3\text{O}$  325.16 found  $m/z$  326.01 ( $\text{M} + \text{H}$ ) $^+$ .

**3,7,7-trimethyl-4-(4-nitrophenyl)-6,7,8,9-tetrahydro-1H-pyrazolo[3,4-b]quinolin-5(4H)-one**  
**, (4f)**

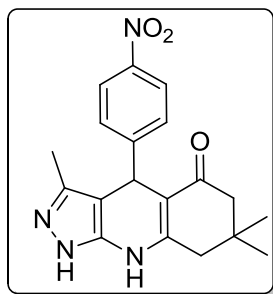

Yellowish solid. mp : 300-301 °C. IR  $\nu_{\max}$  (KBr): 3262, 3078, 2959, 1591, 1513, 1252, 733  $\text{cm}^{-1}$ ;  $^1\text{H}$  NMR (400 MHz,  $\text{CDCl}_3$ ):  $\delta_{\text{H}}$  (ppm) 1.04 (s, 3H,  $\text{CH}_3$ ), 1.17 (s, 3H,  $\text{CH}_3$ ), 2.16 (s, 3H,  $\text{CH}_3$ ), 2.26(d, 1H,  $J = 16$  Hz,  $\text{CH}_2$ ), 2.34(d, 1H,  $J = 16$  Hz,  $\text{CH}_2$ ), 2.40-2.45 (m, 4H,  $\text{CH}_2$ ), 5.41 (s, 1H, 4H), 7.18 (d, 2H,  $J = 8$  Hz, Ar-H), 8.07 (d, 2H,  $J = 8$  Hz, Ar-H.), 11.74 (s, 1H, NH);  $^{13}\text{C}$  NMR (100 MHz,  $\text{CDCl}_3$ ):  $\delta_{\text{C}}$  (ppm) 11.56, 27.45, 29.44, 31.47, 33.25, 40.83, 50.58, 106.58, 114.91, 123.53, 127.63, 129.34, 140.30, 146.10, 146.55, 158.17, 190.97 ; MS ( $\text{ES}^+$ ) calcd  $\text{C}_{19}\text{H}_{20}\text{N}_4\text{O}_3$  352.15 found  $m/z$  353.57 ( $\text{M} + \text{H}$ ) $^+$  and 375.72 ( $\text{M} + 23$ ) $^+$ .

**3,7,7-trimethyl-4-(3-nitrophenyl)-6,7,8,9-tetrahydro-1H-pyrazolo[3,4-b]quinolin-5(4H)-one**  
**, (4g)**

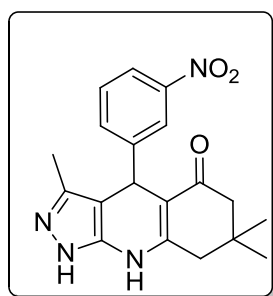

Yellow solid. mp : 299-300 °C. IR  $\nu_{\max}$  (KBr):3215, 3065, 2957, 1578, 1529, 1252, 730  $\text{cm}^{-1}$ ;  $^1\text{H}$  NMR (400 MHz,  $\text{CDCl}_3 + \text{DMSO-d}_6$ ):  $\delta_{\text{H}}$  (ppm) 0.91 (s, 3H,  $\text{CH}_3$ ), 1.04 (s, 3H,  $\text{CH}_3$ ), 2.04 (d, 1H,  $J = 16$  Hz,  $\text{CH}_2$ ), 2.10 (s, 3H,  $\text{CH}_3$ ), 2.17 (d, 1H,  $J = 16$  Hz,  $\text{CH}_2$ ), 2.41-2.51 (m, 2H,  $\text{CH}_2$ ), 5.50 (s, 1H, 4H), 6.27 (s, H, NH), 7.38 (t, 1H, Ar-H), 7.51(d, 1H,  $J = 8$  Hz, Ar-H.), 7.66 (s, 1H, Ar-H), 7.93 (d, 1H,  $J = 8$  Hz Ar-H), 10.12 (s, 1H, NH);  $^{13}\text{C}$  NMR (100 MHz,  $\text{CDCl}_3 + \text{DMSO-d}_6$ ):  $\delta_{\text{C}}$  (ppm) 10.11, 23.64, 32.04, 33.81, 34.25, 37.31, 49.79, 105.66, 109.27, 120.45, 126.39, 127.00, 134.24, 138.14, 142.60, 145.97, 150.09, 153.78, 197.53; MS ( $\text{ES}^+$ ) calcd  $\text{C}_{19}\text{H}_{20}\text{N}_4\text{O}_3$  352.15 found  $m/z$  353.92 ( $\text{M} + \text{H}$ ) $^+$ .

**4-(4-hydroxyphenyl)-3,7,7-trimethyl-6,7,8,9-tetrahydro-1H-pyrazolo[3,4-b]quinolin-5(4H)-one, (4h)**

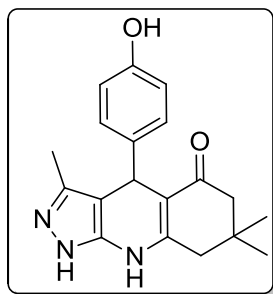

White solid. mp : 273-275 °C. IR  $\nu_{\max}$  (KBr): 3252, 3134, 2961, 1596, 1514, 1245, 838  $\text{cm}^{-1}$ ;  $^1\text{H}$  NMR (400 MHz,  $\text{CDCl}_3$ ):  $\delta_{\text{H}}$  (ppm) 0.94 (s, 3H,  $\text{CH}_3$ ), 1.03 (s, 3H,  $\text{CH}_3$ ), 1.98 (s, 3H,  $\text{CH}_3$ ), 2.12-2.15 (m, 2H,  $\text{CH}_2$ ), 2.30-2.39 (m, 2H,  $\text{CH}_2$ ), 3.42 (s, H, OH), 4.60 (s, 1H, 4H), 6.60 (d, 2H,  $J = 8$  Hz, Ar-H), 7.07 (d, 2H,  $J = 8$  Hz, Ar-H.), 9.06 (s, 1H, NH);  $^{13}\text{C}$  NMR (100 MHz,  $\text{CDCl}_3$ ):  $\delta_{\text{C}}$  (ppm) 9.03, 31.94, 32.95, 33.99, 36.88, 45.44, 52.45, 98.56, 115.48, 119.72, 124.94, 133.94, 139.86, 146.08, 151.08, 154.14, 201.20; MS ( $\text{ES}^+$ ) calcd  $\text{C}_{19}\text{H}_{21}\text{N}_3\text{O}_2$  323.16 found  $m/z$  323.00 ( $\text{M}$ ) $^+$ .

**4-(3-hydroxyphenyl)-3,7,7-trimethyl-6,7,8,9-tetrahydro-1H-pyrazolo[3,4-b]quinolin-5(4H)-one, (4i)**

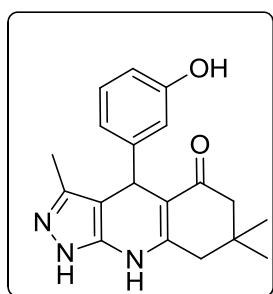

Yellow solid. mp : 271-272 °C. IR  $\nu_{\max}$  (KBr): 3260, 3068, 2959, 1575, 1544, 1254, 775  $\text{cm}^{-1}$ ;  $^1\text{H}$  NMR (400 MHz,  $\text{CDCl}_3$ ):  $\delta_{\text{H}}$  (ppm) 0.95 (s, 3H,  $\text{CH}_3$ ), 0.99 (s, 3H,  $\text{CH}_3$ ), 1.80 (s, 3H,  $\text{CH}_3$ ), 2.03(d, 1H,  $J = 16$  Hz,  $\text{CH}_2$ ), 2.12(d, 1H,  $J = 16$  Hz,  $\text{CH}_2$ ), 2.35-2.40 (m, 2H,  $\text{CH}_2$ ), 4.91 (s, 1H, 4H), 5.42 (s, 1H, OH), 6.46 (d, 1H,  $J = 8$  Hz, Ar-H), 6.61 (d, 1H,  $J = 8$  Hz, Ar-H), 6.89-6.95 (m, 1H, Ar-H.), 7.46 (s, 1H, Ar-H), 9.00(s, H, NH), 9.77 (s, 1H, NH);  $^{13}\text{C}$  NMR (100 MHz,  $\text{CDCl}_3$ ):  $\delta_{\text{C}}$  (ppm) 14.60, 25.94, 27.34, 33.93, 37.03, 40.21, 52.92, 109.30, 110.58, 112.72, 117.42, 123.42, 133.38, 140.53, 141.40, 142.55, 153.02, 158.03, 198.88; MS ( $\text{ES}^+$ )  $\text{C}_{19}\text{H}_{21}\text{N}_3\text{O}_2$  323.16 found  $m/z$  324.05 ( $\text{M} + \text{H}$ ) $^+$ .



**4-(4-methoxyphenyl)-3,7,7-trimethyl-6,7,8,9-tetrahydro-1H-pyrazolo[3,4-b]quinolin-5(4H)-one, (4j).**

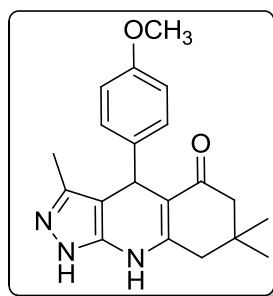

Yellow Crystal. mp : 298 °C. IR  $\nu_{\max}$  (KBr): 3238, 3065, 2962, 1590, 1546, 1253, 761  $\text{cm}^{-1}$ ;  $^1\text{H}$  NMR (400 MHz,  $\text{CDCl}_3 + \text{DMSO-d}_6$ ):  $\delta_{\text{H}}$  (ppm) 0.93 (s, 3H,  $\text{CH}_3$ ), 0.99 (s, 3H,  $\text{CH}_3$ ) 1.88 (s, 3H,  $\text{CH}_3$ ), 1.97 (d, 1H,  $J = 16$  Hz,  $\text{CH}_2$ ), 2.08 (d, 1H,  $J = 16$  Hz,  $\text{CH}_2$ ), 2.37-2.51 (m, 2H,  $\text{CH}_2$ ), 3.64 (s, 3H,  $\text{CH}_3$ ), 4.89 (s, 1H, 4H), 6.62 (d, 2H,  $J = 8$  Hz, Ar-H), 7.03 (d, 2H,  $J = 8$  Hz, Ar-H), 7.74 (s, 1H, NH), 9.27 (s, 1H, NH);  $^{13}\text{C}$  NMR (100 MHz,  $\text{CDCl}_3 + \text{DMSO-d}_6$ ):  $\delta_{\text{C}}$  (ppm) 14.51, 32.10, 32.98, 34.01, 36.99, 39.38, 55.73, 59.84, 109.34, 112.76, 117.96, 133.18, 133.56, 140.22, 145.64, 151.30, 157.85, 198.62; MS ( $\text{ES}^+$ ) calcd  $\text{C}_{20}\text{H}_{23}\text{N}_3\text{O}_2$  337.18 found  $m/z$  338.0 ( $\text{M} + \text{H}$ ) $^+$ , 360.0( $\text{M} + \text{Na}$ ) $^+$ .

**4-(3-methoxyphenyl)-3,7,7-trimethyl-6,7,8,9-tetrahydro-1H-pyrazolo[3,4-b]quinolin-5(4H)-one, (4k)**

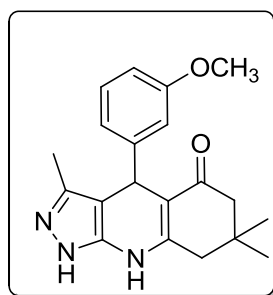

White solid. mp : 292-294 °C. IR  $\nu_{\max}$  (KBr): 3214, 3064, 2957, 1576, 1529, 1252, 730  $\text{cm}^{-1}$ ;  $^1\text{H}$  NMR (400 MHz,  $\text{CDCl}_3 + \text{DMSO-d}_6$ ):  $\delta_{\text{H}}$  (ppm) 0.93 (s, 3H,  $\text{CH}_3$ ), 1.02 (s, 3H,  $\text{CH}_3$ ), 1.97 (s, 3H,  $\text{CH}_3$ ), 2.10 (d, 1H,  $J = 16$  Hz,  $\text{CH}_2$ ), 2.17 (d, 1H,  $J = 16$  Hz,  $\text{CH}_2$ ), 2.24-2.30 (m, 2H,  $\text{CH}_2$ ), 3.67 (s, 3H,  $\text{CH}_3$ ), 5.79 (s, H, NH), 5.83 (s, 1H, 4H), 6.20 (d, 1H,  $J = 8$  Hz, Ar-H), 6.48 (d, 1H,  $J = 8$  Hz, Ar-H), 6.82 (t, 1H, Ar-H), 7.35 (s, 1H, Ar-H);  $^{13}\text{C}$  NMR (100 MHz,  $\text{CDCl}_3$ ):  $\delta_{\text{C}}$  (ppm) 14.20, 27.34, 29.72, 32.50, 38.38, 41.00, 50.78, 55.09, 105.54, 110.86, 112.75, 113.74, 120.26, 129.01, 137.30, 138.22, 139.13, 151.11, 159.41, 198.28; MS ( $\text{ES}^+$ ) calcd  $\text{C}_{20}\text{H}_{23}\text{N}_3\text{O}_2$  337.18 found  $m/z$  338.75 ( $\text{M} + \text{H}$ ) $^+$ .

**4-(2-methoxyphenyl)-3,7,7-trimethyl-6,7,8,9-tetrahydro-1H-pyrazolo[3,4-b]quinolin-5(4H)-one, (4l)**

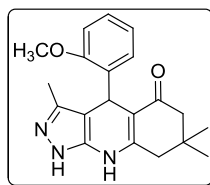

White solid. mp : 297-300 °C. IR  $\nu_{\max}$  (KBr): 3387, 3060, 2957, 2929, 1557, 1249, 744  $\text{cm}^{-1}$ ;  $^1\text{H}$  NMR (400 MHz,  $\text{CDCl}_3$ ):  $\delta_{\text{H}}$  (ppm) 0.93 (s, 3H,  $\text{CH}_3$ ), 1.03 (s, 3H,  $\text{CH}_3$ ), 1.98 (s, 3H,  $\text{CH}_3$ ), 2.05-2.27 (m, 2H,  $\text{CH}_2$ ), 2.32-2.41 (m, 2H,  $\text{CH}_2$ ), 3.64 (s, 3H,  $\text{CH}_3$ ), 5.50 (s, 1H, 4H), 6.73 (d, 1H,  $J = 8$  Hz, Ar-H), 6.82 (t, 1H, Ar-H), 7.13 (t, 1H, Ar-H), 7.19 (d, 1H,  $J = 8$  Hz, Ar-H), 10.41 (s, 1H, NH), 11.84 (s, 1H, NH);  $^{13}\text{C}$  NMR (100 MHz,  $\text{CDCl}_3$ ):  $\delta_{\text{C}}$  (ppm) 18.88, 27.15, 31.88, 34.29, 37.35, 40.88, 51.45, 58.26, 106.04, 113.02, 114.82, 120.99, 124.61, 131.12, 135.49, 142.24, 144.15, 158.28, 193.57; MS ( $\text{ES}^+$ ) calcd  $\text{C}_{20}\text{H}_{23}\text{N}_3\text{O}_2$  337.18 found  $m/z$  360.89 ( $\text{M} + 23$ ) $^+$ .

**4-(3,4-dimethoxyphenyl)-3,7,7-trimethyl-6,7,8,9-tetrahydro-1H-pyrazolo[3,4-b]quinolin-5(4H)-one, (4m)**

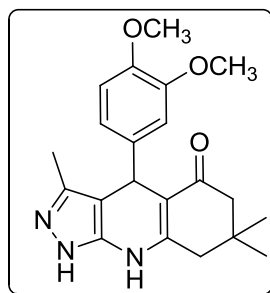

White solid. mp : 307-309 °C. IR  $\nu_{\max}$  (KBr): 3257, 3066, 2957, 1577, 1546, 1256, 744  $\text{cm}^{-1}$ ;  $^1\text{H}$  NMR (400 MHz,  $\text{CDCl}_3 + \text{DMSO-d}_6$ ):  $\delta_{\text{H}}$  (ppm) 0.81 (s, 3H,  $\text{CH}_3$ ), 0.86 (s, 3H,  $\text{CH}_3$ ), 1.79 (s, 3H,  $\text{CH}_3$ ), 1.97 (d, 1H,  $J = 16$  Hz,  $\text{CH}_2$ ), 2.02 (d, 1H,  $J = 16$  Hz,  $\text{CH}_2$ ), 2.21-2.28 (m, 2H,  $\text{CH}_2$ ), 3.57-3.59 (m, 6H,  $\text{CH}_3$ ), 4.84 (s, 1H, 4H), 6.05 (s, H, NH), 6.47 - 6.67 (m, 2H, Ar-H), 7.14 (s, 1H, Ar-H.), 8.14 (s, 1H, NH);  $^{13}\text{C}$  NMR (100 MHz,  $\text{CDCl}_3$ ):  $\delta_{\text{C}}$  (ppm) 13.37, 26.18, 27.17, 28.17, 31.52, 41.21, 49.41, 53.11, 54.81, 109.67, 110.04, 117.85, 118.62, 121.83, 134.27, 137.31, 141.40, 147.50, 147.76, 157.71, 195.99; MS ( $\text{ES}^+$ ) calcd  $\text{C}_{21}\text{H}_{25}\text{N}_3\text{O}_3$  367.19 found  $m/z$  368.0 ( $\text{M} + \text{H}$ ) $^+$ ; 390.0 ( $\text{M} + 23$ ) $^+$ .

**3,7,7-trimethyl-4-(3,4,5-trimethoxyphenyl)-6,7,8,9-tetrahydro-1H-pyrazolo[3,4-b]quinolin-5(4H)-one, (4n)**

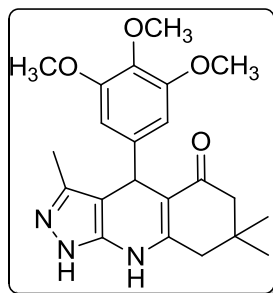

White solid. mp : 319-321 °C. IR  $\nu_{\max}$  (KBr): 3242, 3066, 2962, 1591, 1539, 1252, 755  $\text{cm}^{-1}$ ;  $^1\text{H}$  NMR (400 MHz,  $\text{CDCl}_3$ ):  $\delta_{\text{H}}$  (ppm) 0.93 (s, 3H,  $\text{CH}_3$ ), 0.95 (s, 3H,  $\text{CH}_3$ ), 2.11 (s, 3H,  $\text{CH}_3$ ), 2.17 (d, 1H,  $J = 16$  Hz,  $\text{CH}_2$ ), 2.27 (d, 1H,  $J = 16$  Hz,  $\text{CH}_2$ ), 2.31 (d, 1H,  $J = 16$  Hz,  $\text{CH}_2$ ), 2.36 (d, 1H,  $J = 16$  Hz,  $\text{CH}_2$ ), 3.69 (s, 9H,  $\text{CH}_3$ ), 4.28 (s, H, NH), 5.43 (s, 1H, 4H), 6.22 (s, 1H, Ar-H), 6.37 (s, 1H, Ar-H), 7.88 (s, 1H, NH);  $^{13}\text{C}$  NMR (100 MHz,  $\text{DMSO-d}_6$ ):  $\delta_{\text{C}}$  (ppm) 8.74, 26.87, 27.15, 34.30, 36.48, 43.28, 50.56, 52.37, 55.21, 100.87, 109.19, 113.61, 132.60, 133.25, 136.59, 141.82, 143.65, 147.52, 149.53, 190.88; MS ( $\text{ES}^+$ ) calcd  $\text{C}_{22}\text{H}_{27}\text{N}_3\text{O}_4$  397.20 found  $m/z$  398.0 ( $\text{M} + \text{H}$ ) $^+$ .

**3,7,7-trimethyl-4-(p-tolyl)-6,7,8,9-tetrahydro-1H-pyrazolo[3,4-b]quinolin-5(4H)-one, (4o)**

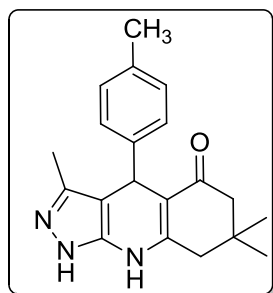

White solid. mp : 309-311 °C. IR  $\nu_{\max}$  (KBr): 3236, 3025, 2957, 1578, 1545, 1249, 770  $\text{cm}^{-1}$ ;  $^1\text{H}$  NMR (400 MHz,  $\text{CDCl}_3$ ):  $\delta_{\text{H}}$  (ppm) 0.92 (s, 3H,  $\text{CH}_3$ ), 1.03 (s, 3H,  $\text{CH}_3$ ), 2.01 (s, 3H,  $\text{CH}_3$ ), 2.08 (d, 1H,  $J = 16$  Hz,  $\text{CH}_2$ ), 2.14 (d, 1H,  $J = 16$  Hz,  $\text{CH}_2$ ), 2.39-2.46 (m, 2H,  $\text{CH}_2$ ), 2.59 (s, 3H,  $\text{CH}_3$ ), 6.02 (s, 1H, 4H), 6.37 (s, H, NH), 6.97 (d, 2H,  $J = 8$  Hz, Ar-H), 7.18 (d, 2H,  $J = 8$  Hz, Ar-H), 11.28 (s, 1H, NH);  $^{13}\text{C}$  NMR (100 MHz,  $\text{CDCl}_3$ ):  $\delta_{\text{C}}$  (ppm) 13.16, 21.13, 27.28, 29.02, 29.70, 32.61, 40.70, 50.35, 105.68, 106.95, 126.77, 129.12, 137.52, 138.79, 148.21, 148.66, 151.41, 193.62; MS ( $\text{ES}^+$ ) calcd  $\text{C}_{20}\text{H}_{23}\text{N}_3\text{O}$  321.18 found  $m/z$  322.40 ( $\text{M} + \text{H}$ ) $^+$ .

**3-(3,7,7-trimethyl-5-oxo-4,5,6,7,8,9-hexahydro-1H-pyrazolo[3,4-b]quinolin-4-yl)benzonitrile, (4p)**

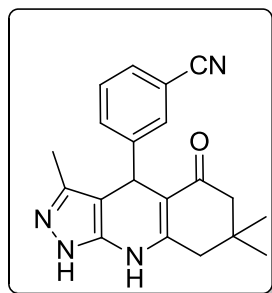

Yellow solid. mp : 287-289 °C. IR  $\nu_{\max}$  (KBr): 3216, 3073, 2957, 2232, 1579, 1539, 791  $\text{cm}^{-1}$ ;  $^1\text{H}$  NMR (400 MHz,  $\text{CDCl}_3$ ):  $\delta_{\text{H}}$  (ppm) 0.94 (s, 3H,  $\text{CH}_3$ ), 1.06 (s, 3H,  $\text{CH}_3$ ) 1.98(s, 3H,  $\text{CH}_3$ ), 2.11-2.28 (m, 2H,  $\text{CH}_2$ ), 2.40-2.47 (m, 2H,  $\text{CH}_2$ ), 6.08 (s, 1H, 4H), 6.52 (s, H, NH), 7.31-7.38 (m, 1H, Ar-H), 7.48 (d, 1H,  $J = 8$  Hz, Ar-H), 7.55 (d, 1H,  $J = 8$  Hz, Ar-H), 7.65 (s, 1H, Ar-H), 10.93 (s, 1H, NH);  $^{13}\text{C}$  NMR (100 MHz,  $\text{CDCl}_3$ ):  $\delta_{\text{C}}$  (ppm) 13.80, 27.42, 28.87, 32.68, 33.22, 40.70, 50.10, 103.76, 105.78, 112.19, 118.82, 129.20, 129.89, 131.66, 133.08, 137.66, 141.66, 143.79, 151.58, 196.54; ; MS ( $\text{ES}^+$ )  $\text{C}_{20}\text{H}_{20}\text{N}_4\text{O}$  332.16 found  $m/z$  333.00 ( $\text{M} + \text{H}$ ) $^+$ .

**4-(4-(dimethylamino)phenyl)-3,7,7-trimethyl-6,7,8,9-tetrahydro-1H-pyrazolo[3,4-b]quinolin-5(4H)-one, (4q)**

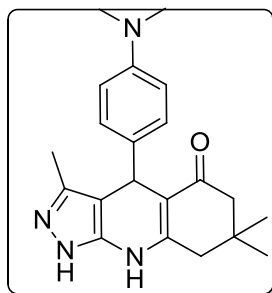

White solid. mp : 257-259 °C. IR  $\nu_{\max}$  (KBr): 3254, 3077, 2958, 1586, 1545, 1252, 794  $\text{cm}^{-1}$ ;  $^1\text{H}$  NMR (400 MHz,  $\text{CDCl}_3$ ):  $\delta_{\text{H}}$  (ppm) 0.95 (s, 3H,  $\text{CH}_3$ ), 0.99 (s, 3H,  $\text{CH}_3$ ) 1.92 (s, 3H,  $\text{CH}_3$ ), 2.06 (d, 1H,  $J = 16$  Hz,  $\text{CH}_2$ ), 2.14(d, 1H,  $J = 16$  Hz,  $\text{CH}_2$ ), 2.30-2.42 (m, 2H,  $\text{CH}_2$ ), 2.80 (s, 6H, $\text{CH}_3$ ), 3.60 (s, 1H, NH), 4.95 (s, 1H, 4H), 6.68 (d, 2H,  $J = 8$  Hz, Ar-H), 7.04 (d, 2H,  $J = 8$  Hz, Ar-H), 8.20 (s, 1H, NH);  $^{13}\text{C}$  NMR (100 MHz,  $\text{CDCl}_3$ ):  $\delta_{\text{C}}$  (ppm) 14.78, 27.39, 28.19, 32.21, 34.40, 40.52, 42.01, 42.47, 50.84, 105.60, 111.62, 114.81, 128.45, 131.05, 137.56, 147.57,149.86, 155.92, 194.97; MS ( $\text{ES}^+$ ) calcd  $\text{C}_{21}\text{H}_{26}\text{N}_4\text{O}$  350.21 found  $m/z$  373.22 ( $\text{M} + \text{Na}$ ) $^+$ .

**4-(4-hydroxy-3-methoxyphenyl)-3,7,7-trimethyl-6,7,8,9-tetrahydro-1H-pyrazolo[3,4-b]quinolin-5(4H)-one, (4t)**

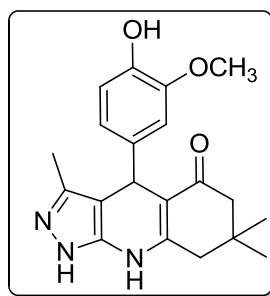

White solid. mp : 281-283 °C. IR  $\nu_{\max}$  (KBr): 3245, 3125, 2970, 1587, 1562, 1265, 767 $\text{cm}^{-1}$ ;  $\delta_{\text{H}}$  (ppm)  $^1\text{H}$  NMR (400 MHz,  $\text{CDCl}_3 + \text{DMSO-d}_6$ ):  $\delta_{\text{H}}$  (ppm) 0.87 (s, 3H,  $\text{CH}_3$ ), 0.99 (s, 3H,  $\text{CH}_3$ ), 1.74 (s, 3H,  $\text{CH}_3$ ), 1.93 (d, 1H,  $J = 16$  Hz,  $\text{CH}_2$ ), 2.13 (d, 1H,  $J = 16$  Hz,  $\text{CH}_2$ ), 2.32-2.38 (m, 2H,  $\text{CH}_2$ ), 3.04 (s, 1H, OH), 4.02 (s, 1H, NH), 4.99 (s, 1H, 4H), 5.16 (s, 3H,  $\text{CH}_3$ ), 6.56 (d, 1H,  $J = 8$  Hz, Ar-H), 6.70 (d, 1H,  $J = 8$  Hz, Ar-H), 7.77 (s, 1H, Ar-H), 9.94 (s, 1H, NH);  $^{13}\text{C}$  NMR (100 MHz,  $\text{CDCl}_3$ ):  $\delta_{\text{C}}$  (ppm) 19.11, 27.34, 32.93, 34.30, 36.98, 38.86, 52.96, 58.91, 103.31, 116.11, 117.83, 119.66, 124.90, 130.02, 133.68, 139.97, 145.89, 149.38, 157.31, 195.37; MS ( $\text{ES}^+$ ) calcd  $\text{C}_{20}\text{H}_{23}\text{N}_3\text{O}_3$  353.17 found  $m/z$  354.97 ( $\text{M} + \text{H}$ ) $^+$ .

**4-(3-chlorophenyl)-3,7,7-trimethyl-6,7,8,9-tetrahydro-1H-pyrazolo[3,4-b]quinolin-5(4H)-one, (4s)**

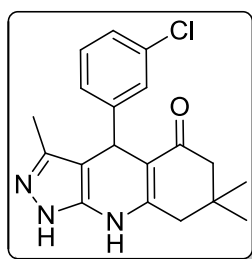

White solid. mp: 301-303 °C. IR  $\nu_{\max}$  (KBr): 3271, 3068, 2961, 1575, 1543, 1258, 752  $\text{cm}^{-1}$ ;  $^1\text{H}$  NMR (400 MHz,  $\text{CDCl}_3$ ):  $\delta_{\text{H}}$  (ppm) 0.92 (s, 3H,  $\text{CH}_3$ ), 1.02 (s, 3H,  $\text{CH}_3$ ), 1.88 (s, 3H,  $\text{CH}_3$ ), 2.12 (d, 1H,  $J = 16$  Hz,  $\text{CH}_2$ ), 2.20 (d, 1H,  $J = 16$  Hz,  $\text{CH}_2$ ), 2.32-2.40 (m, 2H,  $\text{CH}_2$ ), 4.02 (s, 1H, NH), 5.41 (s, 1H, 4H), 6.24 (s, 1H, NH), 7.09 (d, 1H,  $J = 8$  Hz, Ar-H), 7.35 (t, 1H, Ar-H), 7.91 (d, 1H,  $J = 8$  Hz, Ar-H), 8.0 (s, 1H, Ar-H);  $^{13}\text{C}$  NMR (100 MHz,  $\text{CDCl}_3$ ):  $\delta_{\text{C}}$  (ppm) 10.19, 27.41, 28.95, 29.70, 33.83, 41.15, 50.21, 99.85, 105.83, 125.44, 127.77, 128.22, 130.18, 133.54, 144.12, 147.66, 155.49, 159.17, 194.47; MS ( $\text{ES}^+$ ) calcd. for  $\text{C}_{19}\text{H}_{20}\text{ClN}_3\text{O}$  341.13 found  $m/z$  342.16 ( $\text{M} + \text{H}$ ) $^+$ .

**4-(2-hydroxyphenyl)-3,7,7-trimethyl-6,7,8,9-tetrahydro-1H-pyrazolo[3,4-b]quinolin-5(4H)-one, (4t)**

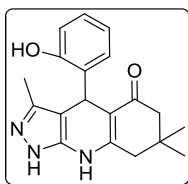

White solid. mp: 268-270 °C. IR  $\nu_{\max}$  (KBr): 3266, 3076, 2961, 1584, 1549, 1253, 752 $\text{cm}^{-1}$ ;  $^1\text{H}$  NMR (400 MHz,  $\text{CDCl}_3 + \text{DMSO-d}_6$ ):  $\delta_{\text{H}}$  (ppm) 0.87 (s, 3H,  $\text{CH}_3$ ), 0.99 (s, 3H,  $\text{CH}_3$ ), 1.75 (s, 3H,  $\text{CH}_3$ ), 2.08 (d, 1H,  $J = 16$  Hz,  $\text{CH}_2$ ), 2.17 (d, 1H,  $J = 16$  Hz,  $\text{CH}_2$ ), 2.35 (d, 1H,  $J = 16$  Hz,  $\text{CH}_2$ ), 2.40 (d, 1H,  $J = 16$  Hz,  $\text{CH}_2$ ), 4.01 (s, 1H, NH), 5.16 (s, 1H, 4H), 6.55 (d, 1H,  $J = 8$  Hz, Ar-H), 6.69 (d, 1H,  $J = 8$  Hz, Ar-H), 6.81-6.88 (m, 2H, Ar-H), 7.76 (s, 1H, OH), 9.93 (s, 1H, NH);  $^{13}\text{C}$  NMR (100 MHz,  $\text{CDCl}_3 + \text{DMSO-d}_6$ ):  $\delta_{\text{C}}$  (ppm) 14.22, 32.22, 33.45, 34.27, 37.10, 40.48, 52.92, 105.81, 109.23, 112.50, 120.10, 122.05, 124.85, 131.46, 134.11, 139.86, 153.74, 158.33, 200.27; MS ( $\text{ES}^+$ )  $\text{C}_{19}\text{H}_{21}\text{N}_3\text{O}_2$  323.16 found  $m/z$  324.16 ( $\text{M} + \text{H}$ ) $^+$ .

**3,7,7-trimethyl-4-phenyl-6,7,8,9-tetrahydro-1H-pyrazolo[3,4-b]quinolin-5(4H)-one, (4u)**

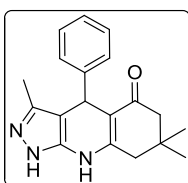

White solid. mp: 231-233 °C. IR  $\nu_{\max}$  (KBr): 3239, 3061, 2958, 1587, 1549, 1251, 752 $\text{cm}^{-1}$ ;  $^1\text{H}$  NMR (400 MHz,  $\text{CDCl}_3$ ):  $\delta_{\text{H}}$  (ppm) 0.91 (s, 3H,  $\text{CH}_3$ ), 1.00 (s, 3H,  $\text{CH}_3$ ), 1.90 (s, 3H,  $\text{CH}_3$ ), 1.99-2.02 (m, 2H,  $\text{CH}_2$ ), 2.09 (d,  $J = 16$  Hz, 1H), 2.16 (d,  $J = 16$  Hz, 1H), 5.39 (s, 1H, 4H), 6.26 (s, 1H, NH), 7.01-7.39 (m, 5H, Ar-H), 9.81 (s, 1H, NH);  $^{13}\text{C}$  NMR (100 MHz,  $\text{CDCl}_3 + \text{DMSO-d}_6$ ):  $\delta_{\text{C}}$  (ppm) 14.20, 27.30, 29.13, 32.46, 34.94, 40.50, 50.50, 106.27, 115.40, 128.03, 129.84, 137.50, 142.61, 149.08, 158.23, 195.97; MS ( $\text{ES}^+$ )  $\text{C}_{19}\text{H}_{21}\text{N}_3\text{O}$  307.17 found  $m/z$  308.15 ( $\text{M} + \text{H}$ ) $^+$ .

## HPLC ANALYSIS:

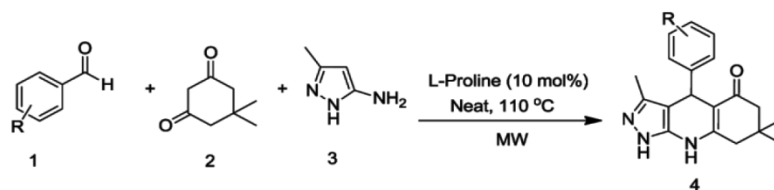

Enantiomeric ratio (08:92) was determined by chiral HPLC analysis on AGELA CHIRAL ADV column, isopropanol: n- hexane (20: 80), flow 0.5 ml/min, UV 254 nm.

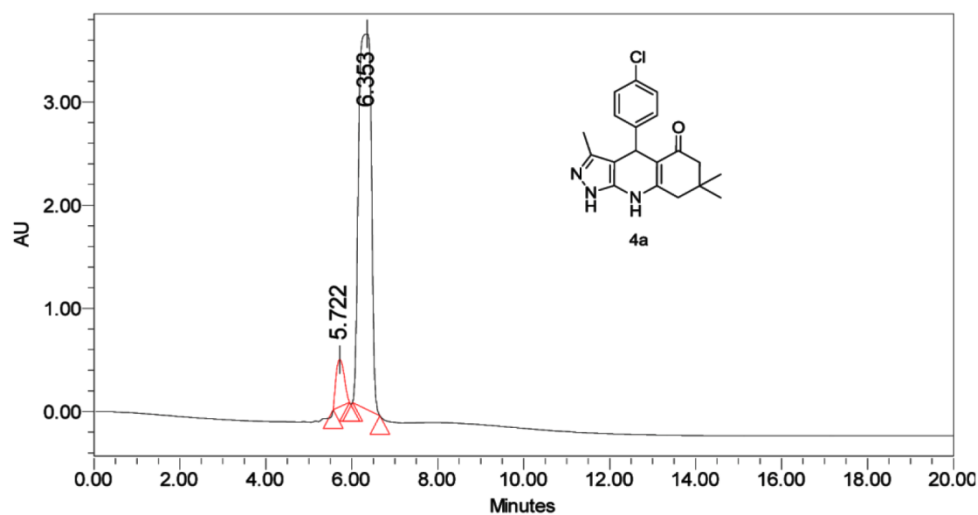

| Name | Retention Time | Area     | % Area | Height  |
|------|----------------|----------|--------|---------|
| 1    | 5.722          | 6060697  | 7.58   | 458915  |
| 2    | 6.353          | 73941090 | 92.42  | 3646059 |

## Racemic Mixture:

Enantiomeric ratio (49.81:50.19) was determined by chiral HPLC analysis on AGELA CHIRAL ADV column, isopropanol: n- hexane (20: 80), flow 0.5 ml/min, UV 254 nm.

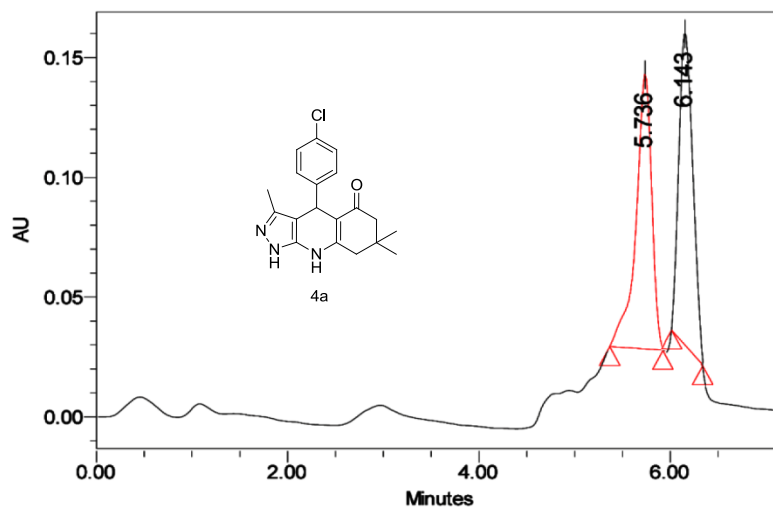

| Name | Retention Time | Area    | % Area | Height |
|------|----------------|---------|--------|--------|
| 1    | 5.736          | 1320809 | 49.81  | 114818 |
| 2    | 6.143          | 1330940 | 50.19  | 130308 |

Enantiomeric ratio (71:29) was determined by chiral HPLC analysis on AGELA CHIRAL ADV column, isopropanol: n- hexane (12: 88), flow 0.5 ml/min, UV 254 nm.

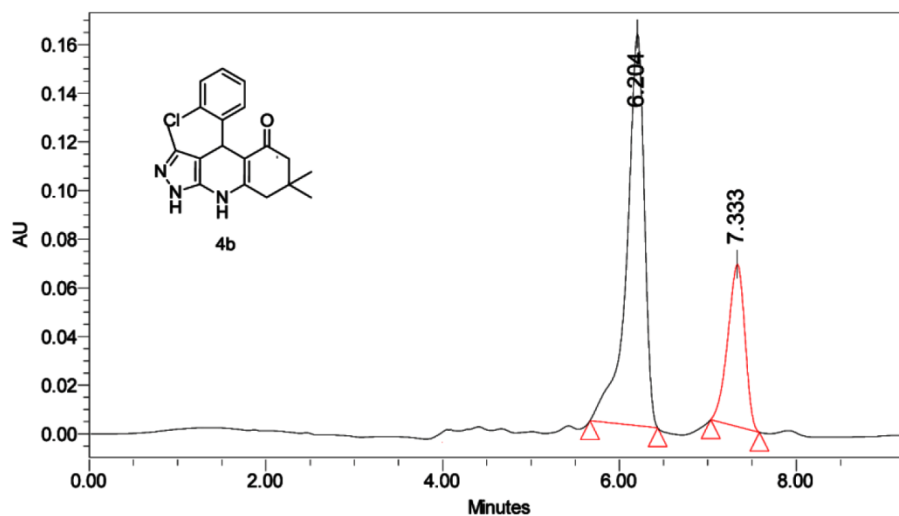

| Name | Retention Time | Area    | % Area | Height |
|------|----------------|---------|--------|--------|
| 1    | 6.204          | 2245976 | 71.45  | 161558 |
| 2    | 7.333          | 897256  | 28.55  | 66827  |

Racemic Mixture:

Enantiomeric ratio (52.65:47.35) was determined by chiral HPLC analysis on AGELA CHIRAL ADV column, isopropanol: n- hexane (12: 88), flow 0.5 ml/min, UV 254 nm.

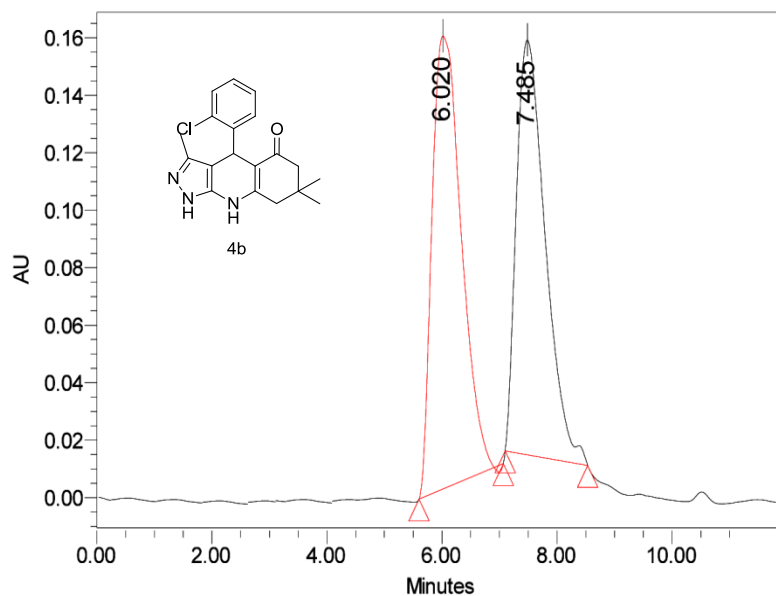

| Name | Retention Time | Area    | % Area | Height |
|------|----------------|---------|--------|--------|
| 1    | 6.020          | 5597017 | 52.65  | 157677 |
| 2    | 7.485          | 5033941 | 47.35  | 144386 |



Enantiomeric ratio (07:93) was determined by chiral HPLC analysis on AGELA CHIRAL ADV column, isopropanol: n- hexane (14: 86), flow 0.5 ml/min, UV 254 nm.

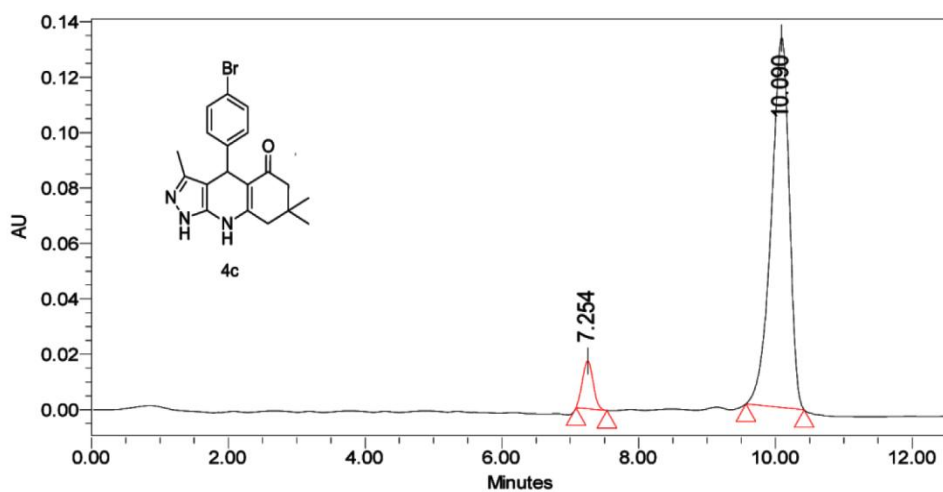

| Name | Retention Time | Area    | % Area | Height |
|------|----------------|---------|--------|--------|
| 1    | 7.254          | 188874  | 7.17   | 17346  |
| 2    | 10.090         | 2446728 | 92.83  | 133567 |

Racemic Mixture:

Enantiomeric ratio (51.22:48.78) was determined by chiral HPLC analysis on AGELA CHIRAL ADV column, isopropanol: n- hexane (14: 86), flow 0.5 ml/min, UV 254 nm.

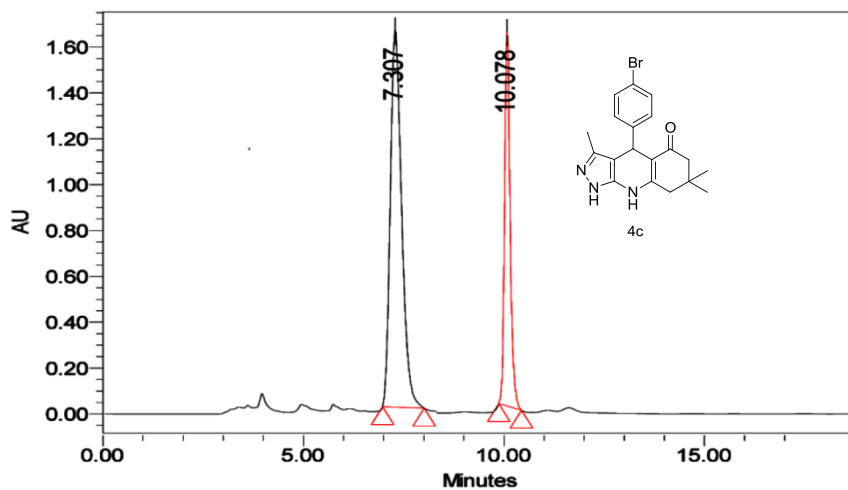

| Name | Retention Time | Area     | % Area | Height  |
|------|----------------|----------|--------|---------|
| 1    | 7.307          | 16507143 | 51.22  | 1657928 |
| 2    | 10.078         | 15720890 | 48.78  | 1637936 |

Enantiomeric ratio (85:15) was determined by chiral HPLC analysis on AGELA CHIRAL ADV column, isopropanol: n- hexane (14: 86), flow 0.5 ml/min, UV 254 nm.

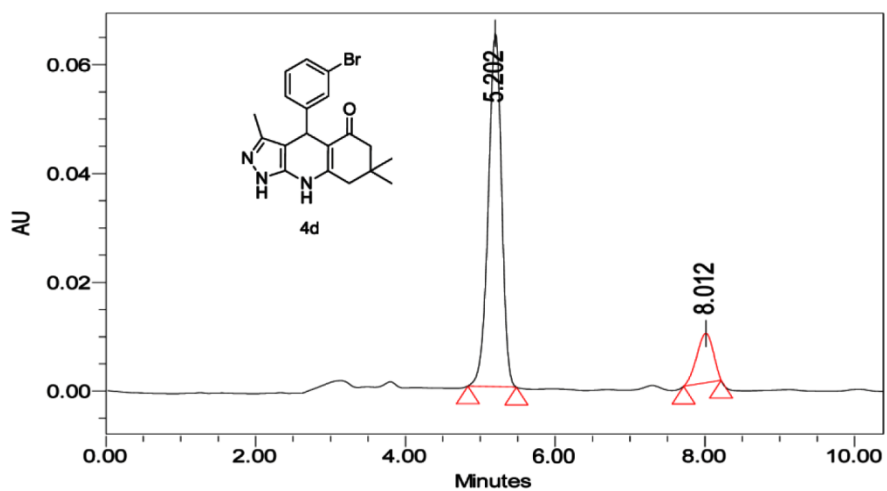

| Name | Retention Time | Area   | % Area | Height |
|------|----------------|--------|--------|--------|
| 1    | 5.202          | 801033 | 85.30  | 65085  |
| 2    | 8.012          | 137993 | 14.70  | 9102   |

Racemic Mixture:

Enantiomeric ratio (53.63:46.37) was determined by chiral HPLC analysis on AGELA CHIRAL ADV column, isopropanol: n- hexane (14: 86), flow 0.5 ml/min, UV 254 nm.

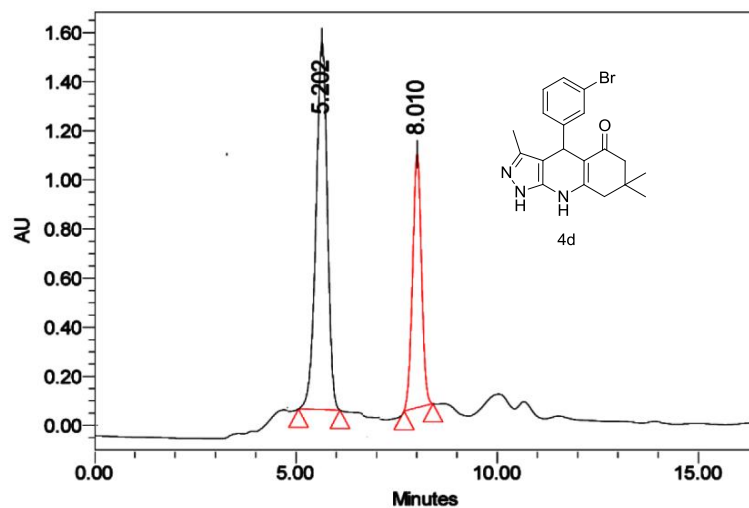

| Name | Retention Time | Area     | % Area | Height  |
|------|----------------|----------|--------|---------|
| 1    | 5.202          | 18412002 | 53.63  | 1566132 |
| 2    | 8.010          | 15916534 | 46.37  | 1035726 |

Enantiomeric ratio (28:72) was determined by chiral HPLC analysis on AGELA CHIRAL ADV column, isopropanol: n- hexane (12: 88), flow 0.5 ml/min, UV 254 nm.

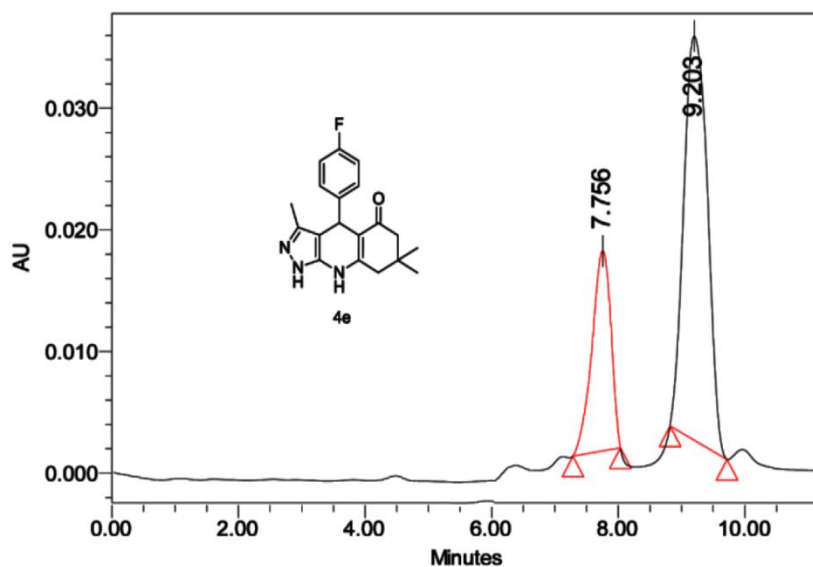

| Name | Retention Time | Area   | % Area | Height |
|------|----------------|--------|--------|--------|
| 1    | 7.756          | 341840 | 28.32  | 16469  |
| 2    | 9.203          | 865157 | 71.68  | 33245  |

Racemic Mixture:

Enantiomeric ratio (49.61:50.39) was determined by chiral HPLC analysis on AGELA CHIRAL ADV column, isopropanol: n- hexane (12: 88), flow 0.5 ml/min, UV 254 nm.

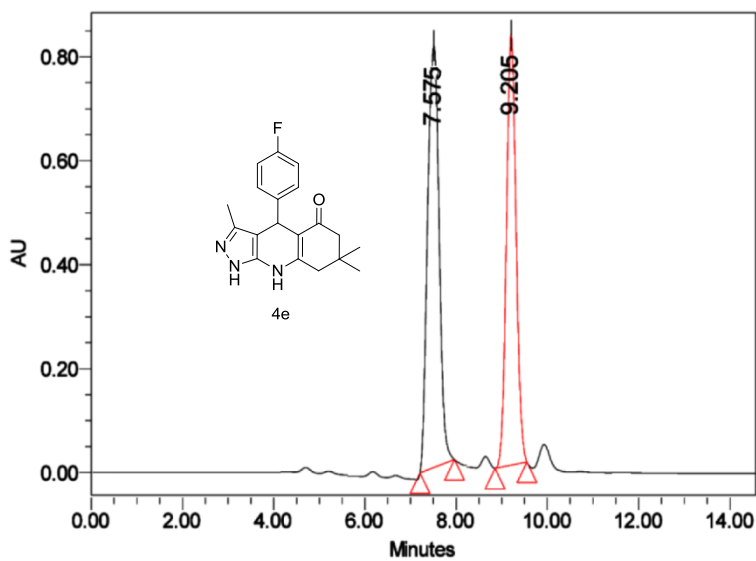

| Name | Retention Time | Area     | % Area | Height |
|------|----------------|----------|--------|--------|
| 1    | 7.575          | 12017504 | 49.61  | 817594 |
| 2    | 9.205          | 12206207 | 50.39  | 828958 |

Enantiomeric ratio (99.3:0.7) was determined by chiral HPLC analysis on AGELA CHIRAL ADV column, isopropanol: n- hexane (12: 88), flow 0.5 ml/min, UV 254 nm.

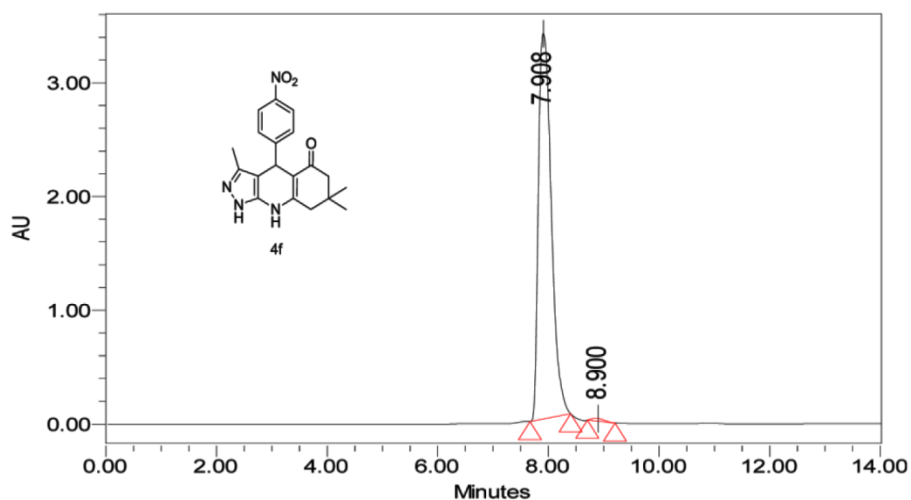

| Name | Retention Time | Area     | % Area | Height  |
|------|----------------|----------|--------|---------|
| 1    | 7.908          | 55317444 | 99.30  | 3396999 |
| 2    | 8.900          | 389499   | 0.70   | 24089   |

Racemic Mixture:

Enantiomeric ratio (47.72:52.28) was determined by chiral HPLC analysis on AGELA CHIRAL ADV column, isopropanol: n- hexane (12: 88), flow 0.5 ml/min, UV 254 nm.

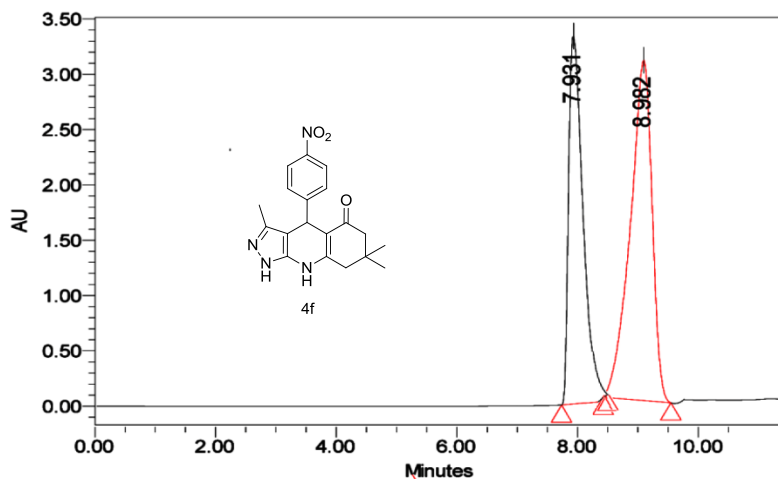

| Name | Retention Time | Area   | % Area | Height  |
|------|----------------|--------|--------|---------|
| 1    | 7.931          | 550908 | 47.72  | 3328096 |
| 2    | 8.982          | 603719 | 52.28  | 3126126 |

Enantiomeric ratio (98:02) was determined by chiral HPLC analysis on AGELA CHIRAL ADV column, isopropanol: n- hexane (12: 88), flow 0.5 ml/min, UV 254 nm.

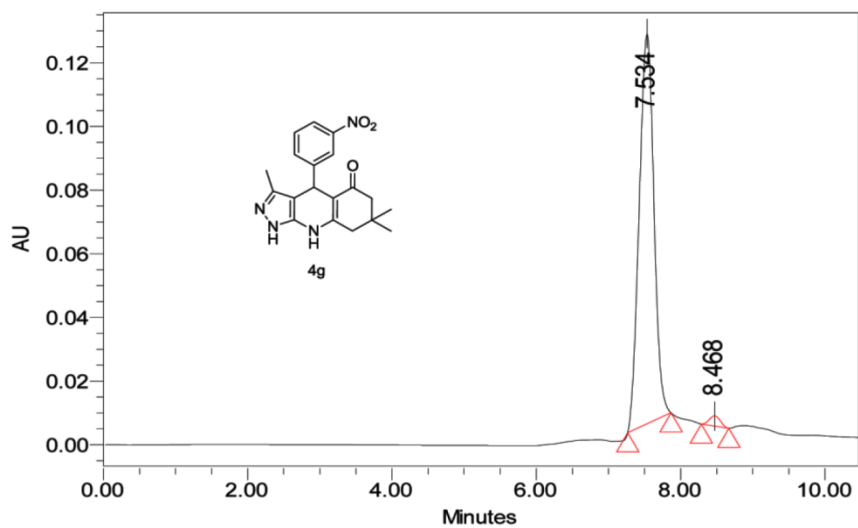

| Name | Retention Time | Area    | % Area | Height |
|------|----------------|---------|--------|--------|
| 1    | 7.534          | 1737088 | 98.09  | 122623 |
| 2    | 8.468          | 33822   | 1.91   | 3176   |

Racemic Mixture:

Enantiomeric ratio (55.38:44.62) was determined by chiral HPLC analysis on AGELA CHIRAL ADV column, isopropanol: n- hexane (12: 88), flow 0.5 ml/min, UV 254 nm.

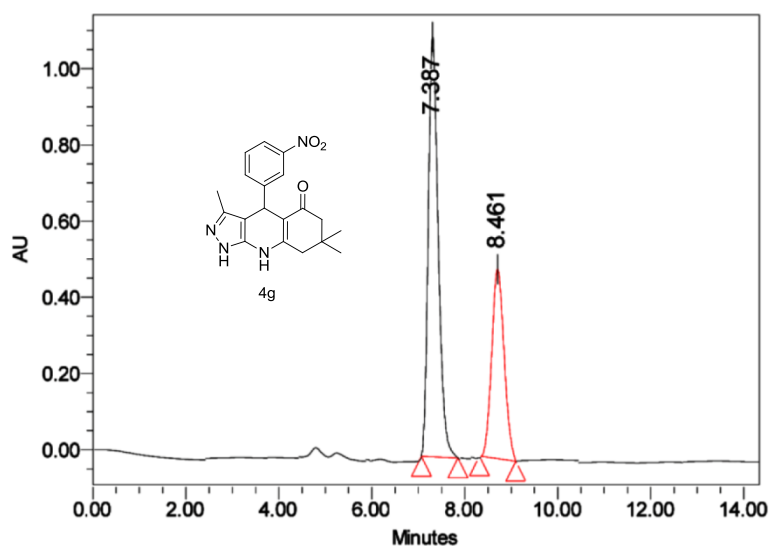

| Name | Retention Time | Area     | % Area | Height  |
|------|----------------|----------|--------|---------|
| 1    | 7.387          | 16507143 | 55.38  | 1105704 |
| 2    | 8.461          | 13298724 | 44.62  | 482062  |

Enantiomeric ratio (98.64:1.36) was determined by chiral HPLC analysis on AGELA CHIRAL ADV column, isopropanol: n- hexane (12: 88), flow 0.5 ml/min, UV 254 nm.

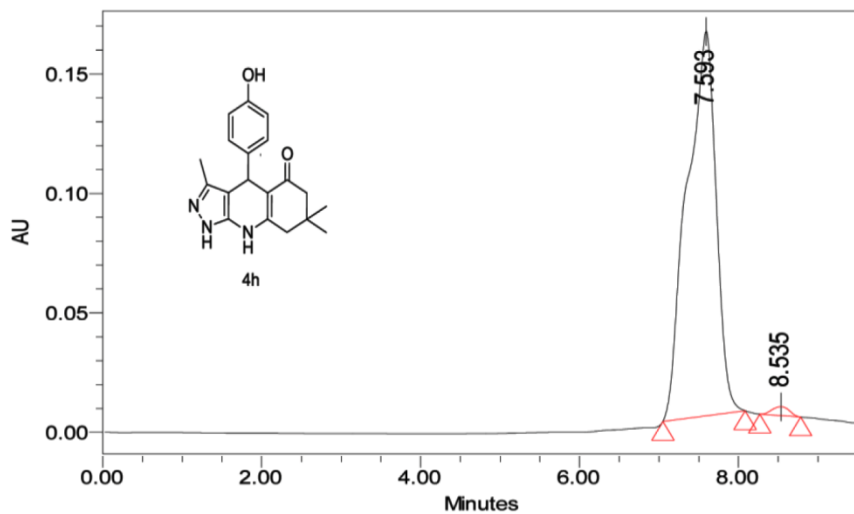

|   | Name | Retention Time | Area    | % Area | Height |
|---|------|----------------|---------|--------|--------|
| 1 |      | 7.593          | 4073832 | 98.64  | 161206 |
| 2 |      | 8.535          | 56300   | 1.36   | 3725   |

Racemic Mixture:

Enantiomeric ratio (54.68:45.32) was determined by chiral HPLC analysis on AGELA CHIRAL ADV column, isopropanol: n- hexane (12: 88), flow 0.5 ml/min, UV 254 nm.

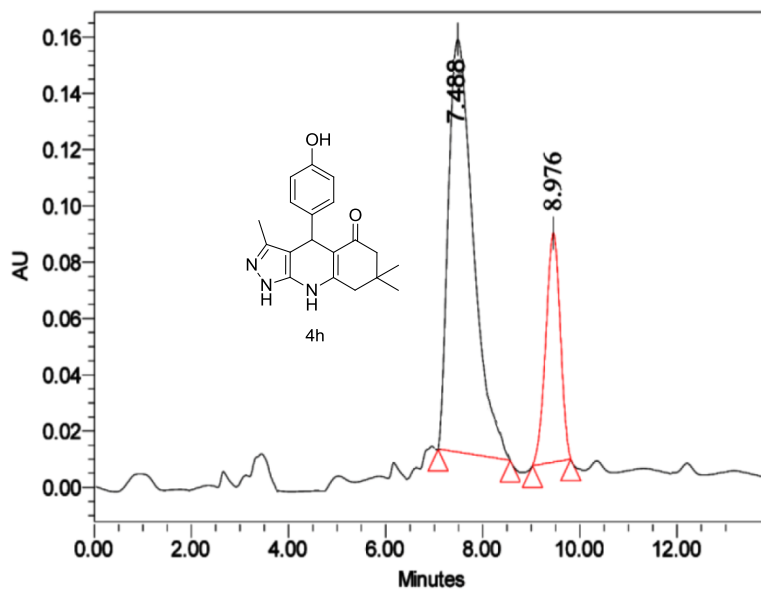

|   | Name | Retention Time | Area    | % Area | Height |
|---|------|----------------|---------|--------|--------|
| 1 |      | 7.488          | 5015003 | 54.68  | 147048 |
| 2 |      | 8.976          | 4156915 | 45.32  | 817875 |

Enantiomeric ratio (99.01:0.99) was determined by chiral HPLC analysis on AGELA CHIRAL ADV column, isopropanol: n- hexane (18: 82), flow 0.5 ml/min, UV 254 nm.

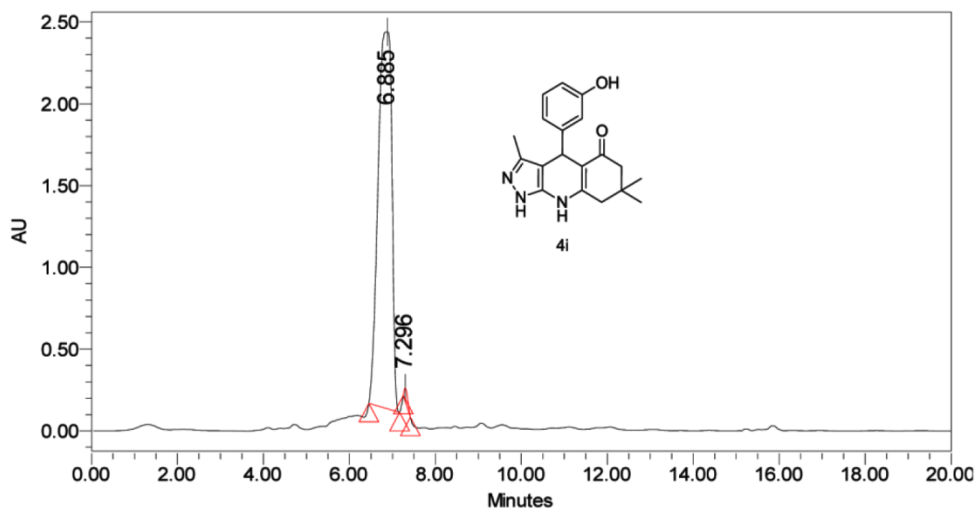

| Name | Retention Time | Area     | % Area | Height  |
|------|----------------|----------|--------|---------|
| 1    | 6.885          | 51284829 | 99.01  | 2307717 |
| 2    | 7.296          | 512465   | 0.99   | 81797   |

Racemic Mixture:

Enantiomeric ratio (48.61:51.39) was determined by chiral HPLC analysis on AGELA CHIRAL ADV column, isopropanol: n- hexane (18: 82), flow 0.5 ml/min, UV 254 nm.

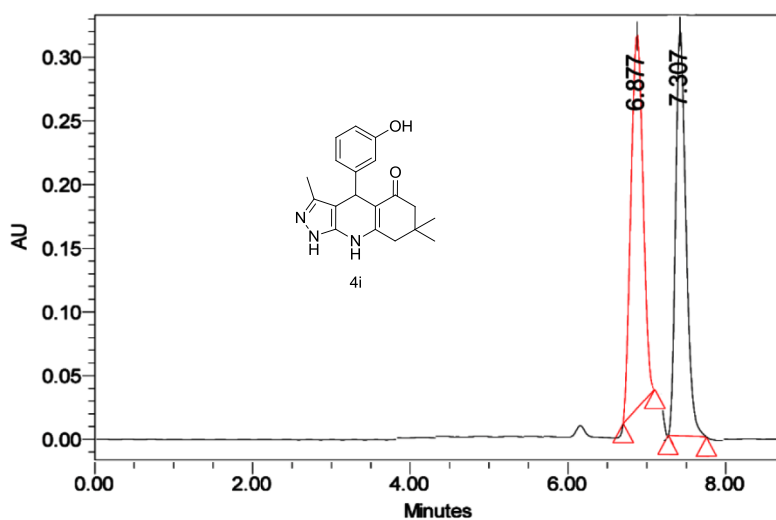

| Name | Retention Time | Area    | % Area | Height |
|------|----------------|---------|--------|--------|
| 1    | 6.877          | 3128282 | 48.61  | 293627 |
| 2    | 7.307          | 3307143 | 51.39  | 295125 |

Enantiomeric ratio (99.06:0.94) was determined by chiral HPLC analysis on AGELA CHIRAL ADV column, isopropanol: n- hexane (12: 88), flow 0.5 ml/min, UV 254 nm.

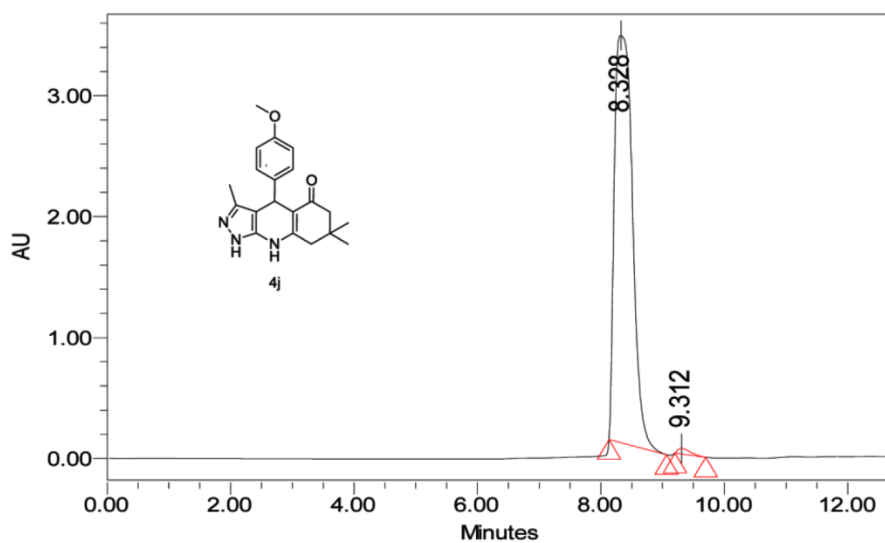

|   | Retention Time | Area     | % Area | Height  |
|---|----------------|----------|--------|---------|
| 1 | 8.328          | 68635889 | 99.06  | 3366449 |
| 2 | 9.312          | 654647   | 0.94   | 47336   |

Racemic Mixture:

Enantiomeric ratio (49.78:50.22) was determined by chiral HPLC analysis on AGELA CHIRAL ADV column, isopropanol: n- hexane (12: 88), flow 0.5 ml/min, UV 254 nm.

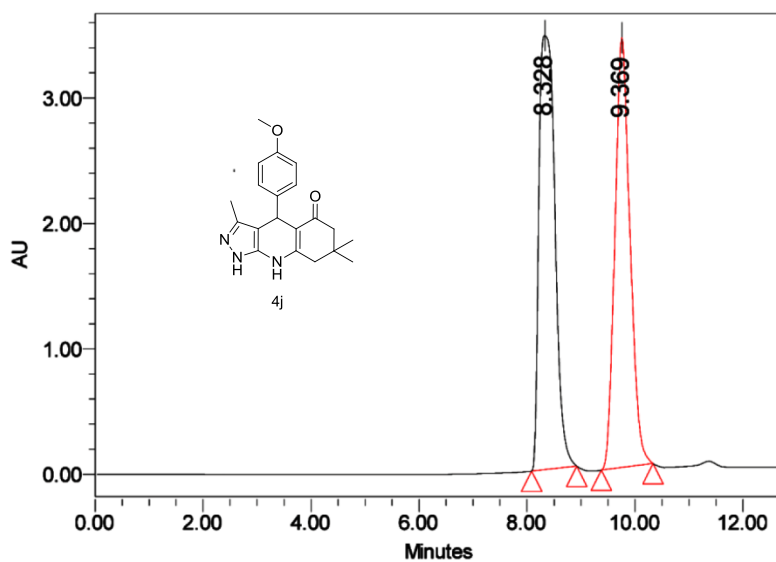

|   | Name | Retention Time | Area     | % Area | Height  |
|---|------|----------------|----------|--------|---------|
| 1 |      | 8.328          | 71437728 | 49.78  | 3465094 |
| 2 |      | 9.369          | 72078520 | 50.22  | 3425094 |



Enantiomeric ratio (91.44:8.56) was determined by chiral HPLC analysis on AGELA CHIRAL ADV column, isopropanol: n- hexane (14: 86), flow 0.5 ml/min, UV 254 nm.

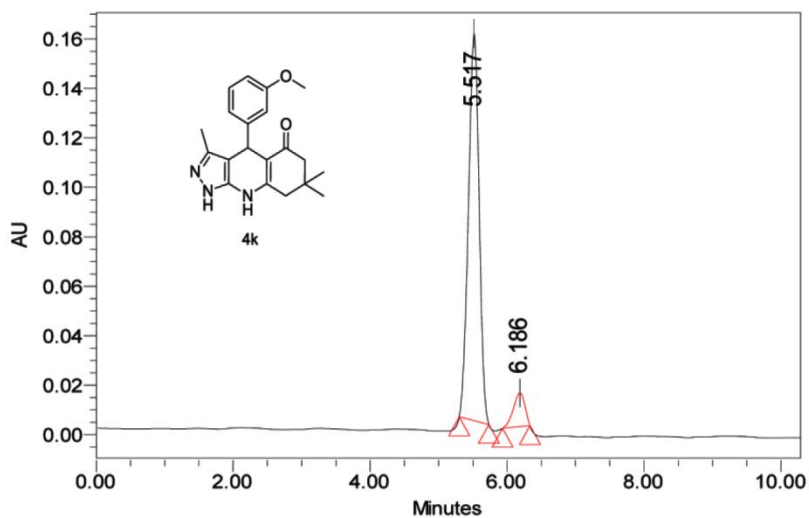

| Name | Retention Time | Area    | % Area | Height |
|------|----------------|---------|--------|--------|
| 1    | 5.517          | 1700048 | 91.44  | 156612 |
| 2    | 6.186          | 159116  | 8.56   | 13661  |

Racemic Mixture:

Enantiomeric ratio (48.19:51.81) was determined by chiral HPLC analysis on AGELA CHIRAL ADV column, isopropanol: n- hexane (14: 86), flow 0.5 ml/min, UV 254 nm.

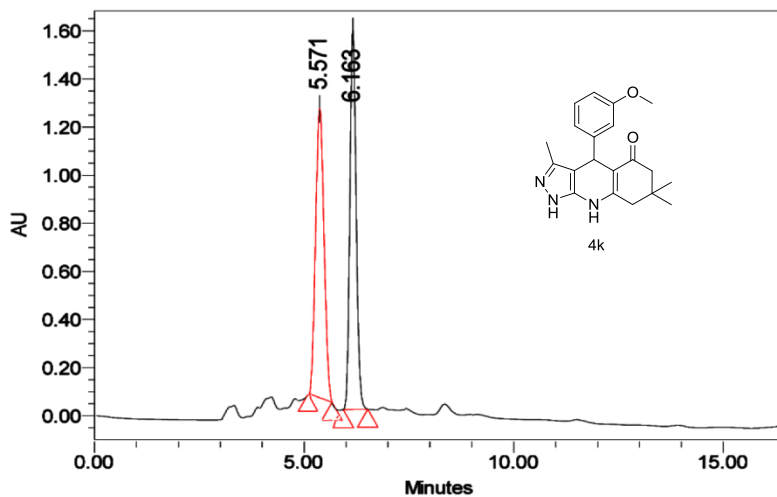

| Name | Retention Time | Area     | % Area | Height  |
|------|----------------|----------|--------|---------|
| 1    | 5.571          | 15264888 | 48.19  | 1307716 |
| 2    | 6.163          | 16412002 | 51.81  | 1576132 |

Enantiomeric ratio (0.93:99.07) was determined by chiral HPLC analysis on AGELA CHIRAL ADV column, isopropanol: n- hexane (20: 80), flow 0.5 ml/min, UV 254 nm.

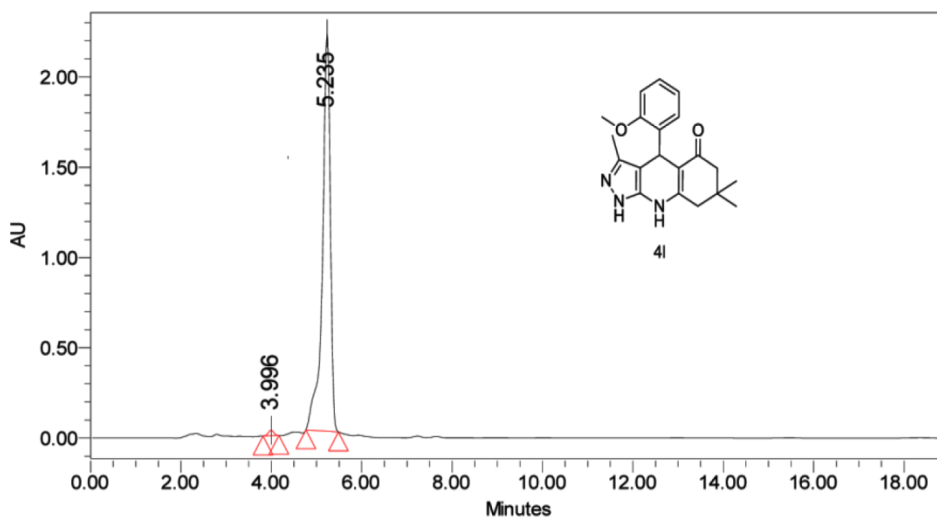

| Name | Retention Time | Area     | % Area | Height  |
|------|----------------|----------|--------|---------|
| 1    | 3.996          | 252704   | 0.93   | 30674   |
| 2    | 5.235          | 26804403 | 99.07  | 2204147 |

Racemic Mixture:

Enantiomeric ratio (49.62:50.38) was determined by chiral HPLC analysis on AGELA CHIRAL ADV column, isopropanol: n- hexane (20: 80), flow 0.5 ml/min, UV 254 nm.

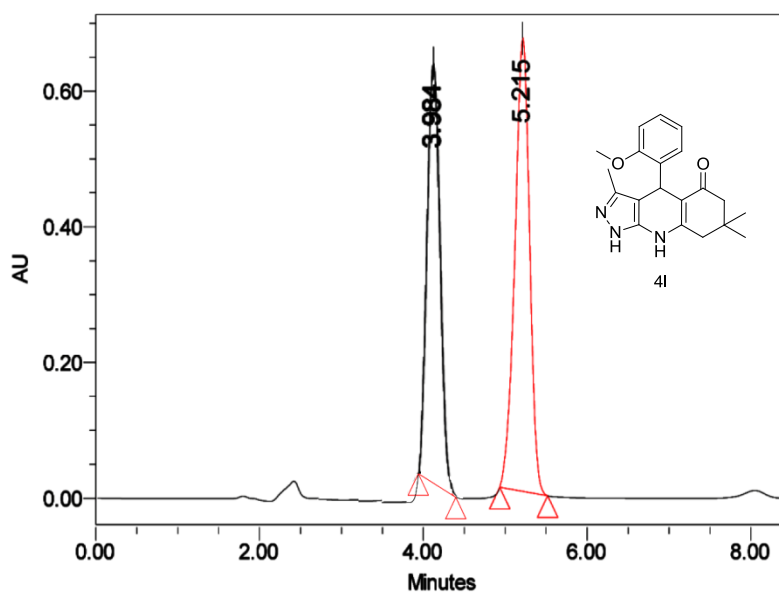

| Name | Retention Time | Area    | % Area | Height |
|------|----------------|---------|--------|--------|
| 1    | 3.984          | 8235762 | 49.62  | 646417 |
| 2    | 5.215          | 8363262 | 50.38  | 668131 |

Enantiomeric ratio (1.08:98.92) was determined by chiral HPLC analysis on AGELA CHIRAL ADV column, isopropanol: n- hexane (12: 88), flow 0.5 ml/min, UV 254 nm.

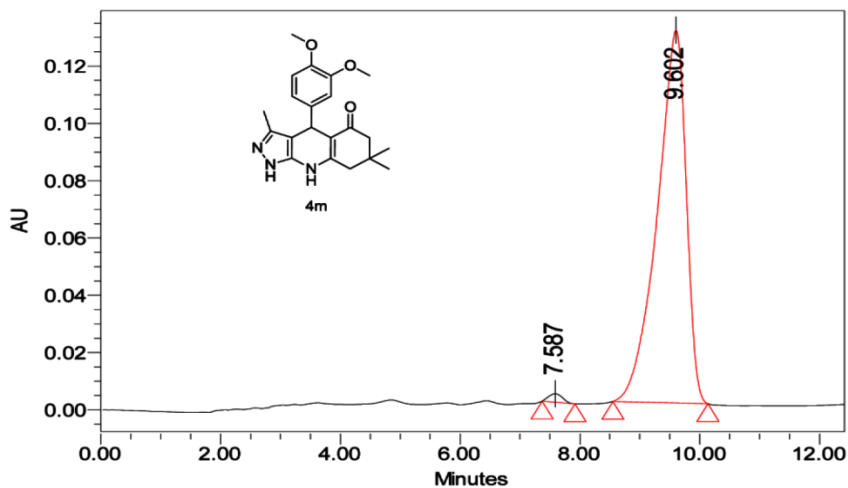

| Name | Retention Time | Area    | % Area | Height |
|------|----------------|---------|--------|--------|
| 1    | 7.587          | 47456   | 1.08   | 2966   |
| 2    | 9.602          | 4357965 | 98.92  | 130197 |

Racemic Mixture:

Enantiomeric ratio (29.50:70.50) was determined by chiral HPLC analysis on AGELA CHIRAL ADV column, isopropanol: n- hexane (12: 88), flow 0.5 ml/min, UV 254 nm.

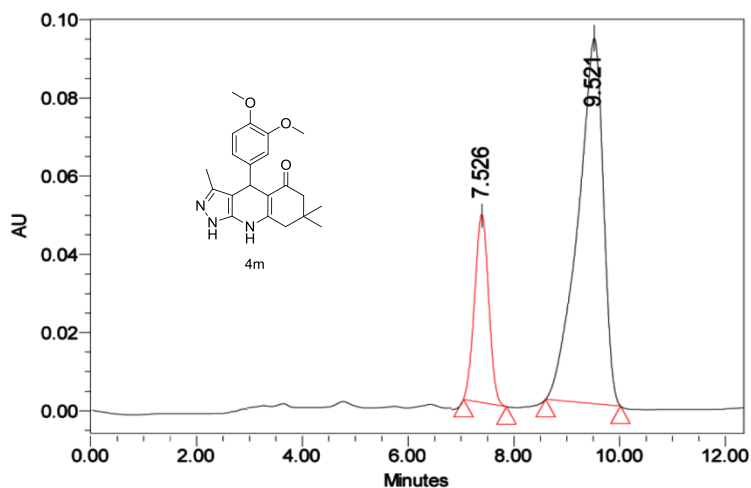

| Name | Retention Time | Area    | % Area | Height |
|------|----------------|---------|--------|--------|
| 1    | 7.526          | 1299028 | 29.50  | 50072  |
| 2    | 9.521          | 3104394 | 70.50  | 93470  |

Enantiomeric ratio (96.22:3.78) was determined by chiral HPLC analysis on AGELA CHIRAL ADV column, isopropanol: n- hexane (18: 82), flow 0.5 ml/min, UV 254 nm.

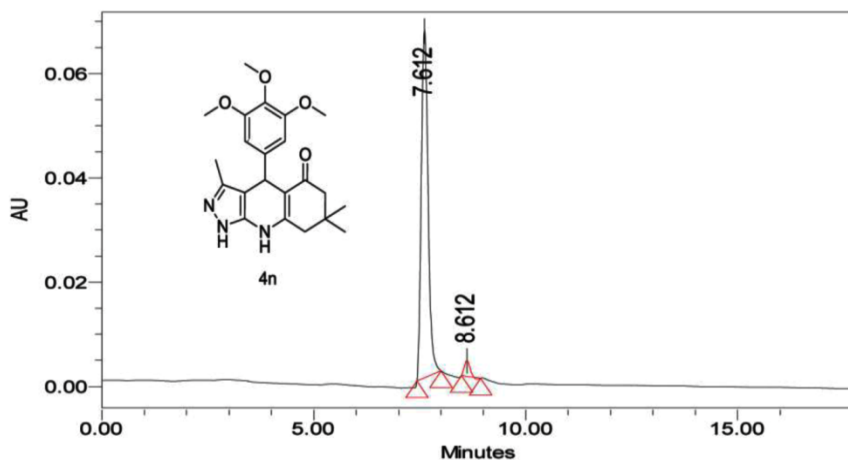

| Name | Retention Time | Area   | % Area | Height |
|------|----------------|--------|--------|--------|
| 1    | 7.612          | 741349 | 96.22  | 66747  |
| 2    | 8.612          | 29102  | 3.78   | 2968   |

Racemic Mixture:

Enantiomeric ratio (55.07:44.93) was determined by chiral HPLC analysis on AGELA CHIRAL ADV column, isopropanol: n- hexane (18: 82), flow 0.5 ml/min, UV 254 nm.

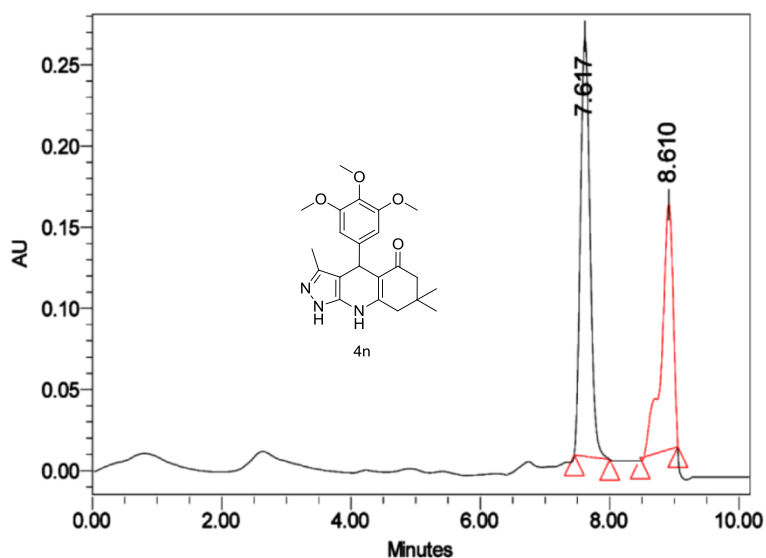

| Name | Retention Time | Area   | % Area | Height |
|------|----------------|--------|--------|--------|
| 1    | 7.617          | 427603 | 55.07  | 258839 |
| 2    | 8.610          | 348884 | 44.93  | 159799 |

Enantiomeric ratio (99.29:0.71) was determined by chiral HPLC analysis on AGELA CHIRAL ADV column, isopropanol: n- hexane (12: 88), flow 0.5 ml/min, UV 254 nm.

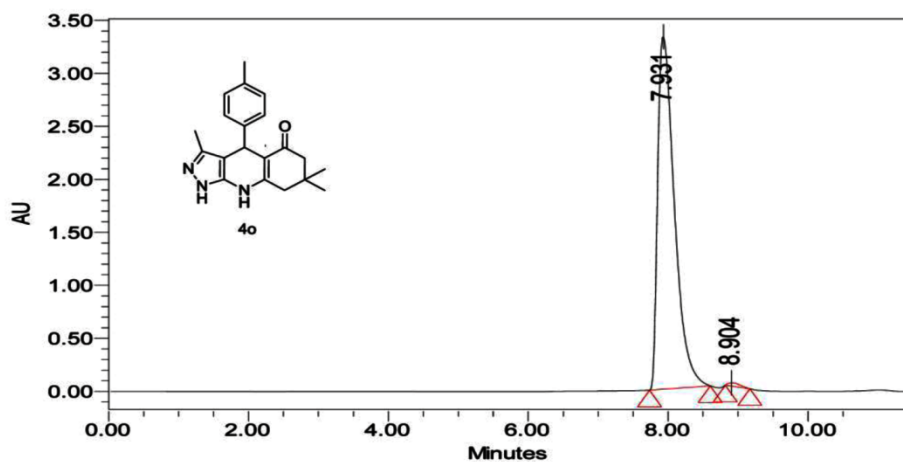

| Name | Retention Time | Area     | % Area | Height  |
|------|----------------|----------|--------|---------|
| 1    | 7.931          | 55520908 | 99.29  | 3328096 |
| 2    | 8.904          | 396877   | 0.71   | 31274   |

Racemic Mixture:

Enantiomeric ratio (47.45:52.55) was determined by chiral HPLC analysis on AGELA CHIRAL ADV column, isopropanol: n- hexane (12: 88), flow 0.5 ml/min, UV 254 nm.

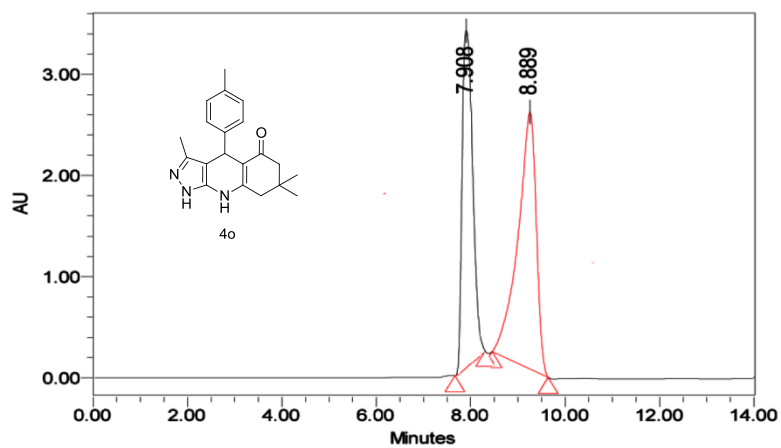

| Name | Retention Time | Area     | % Area | Height  |
|------|----------------|----------|--------|---------|
| 1    | 7.908          | 47317444 | 47.45  | 3396999 |
| 2    | 8.889          | 52399499 | 52.55  | 2620000 |

Enantiomeric ratio (98.15:1.85) was determined by chiral HPLC analysis on AGELA CHIRAL ADV column, isopropanol: n- hexane (12: 88), flow 0.5 ml/min, UV 254 nm.

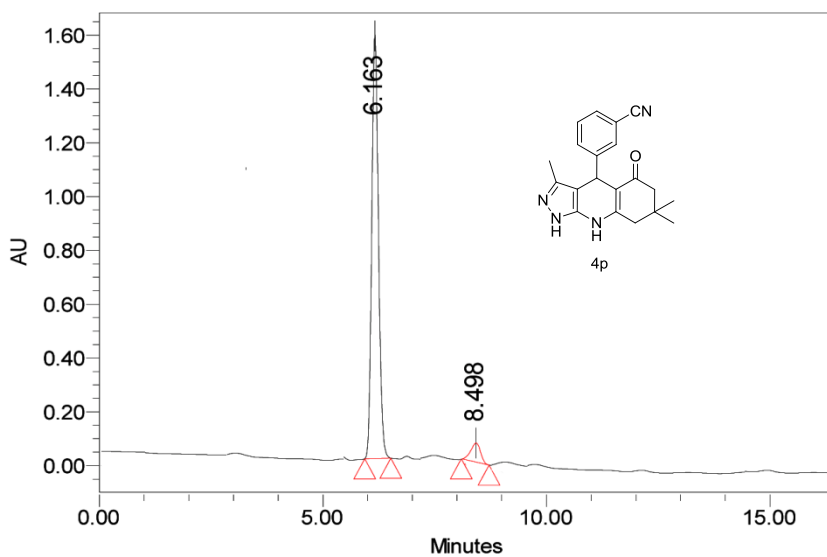

|   | Name | Retention Time | Area    | % Area | Height  |
|---|------|----------------|---------|--------|---------|
| 1 |      | 6.163          | 5271706 | 98.15  | 1576132 |
| 2 |      | 8.498          | 99153   | 1.85   | 8101    |

Racemic Mixture:

Enantiomeric ratio (48.82:51.18) was determined by chiral HPLC analysis on AGELA CHIRAL ADV column, isopropanol: n- hexane (12: 88), flow 0.5 ml/min, UV 254 nm.

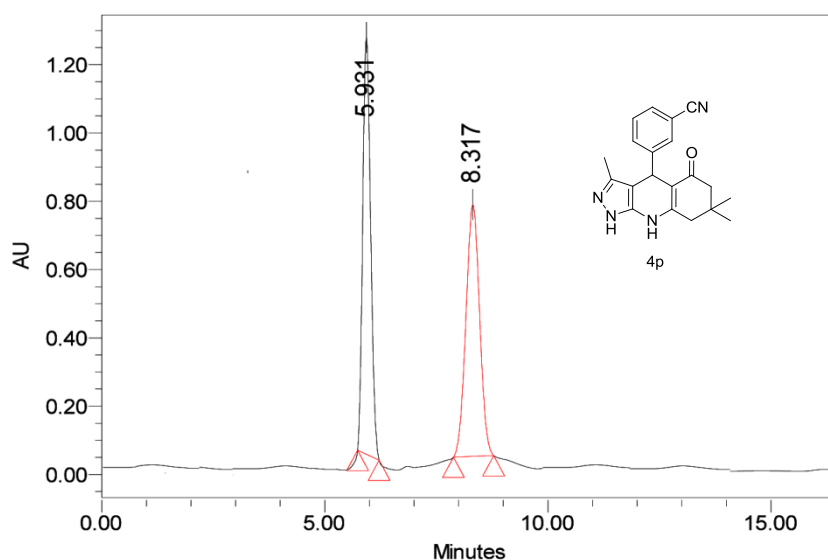

|   | Name | Retention Time | Area     | % Area | Height  |
|---|------|----------------|----------|--------|---------|
| 1 |      | 5.931          | 14957808 | 48.82  | 1221773 |
| 2 |      | 8.317          | 15681364 | 51.18  | 737149  |

Enantiomeric ratio (91.08:8.92) was determined by chiral HPLC analysis on AGELA CHIRAL ADV column, isopropanol: n- hexane (12: 88), flow 0.5 ml/min, UV 254 nm.

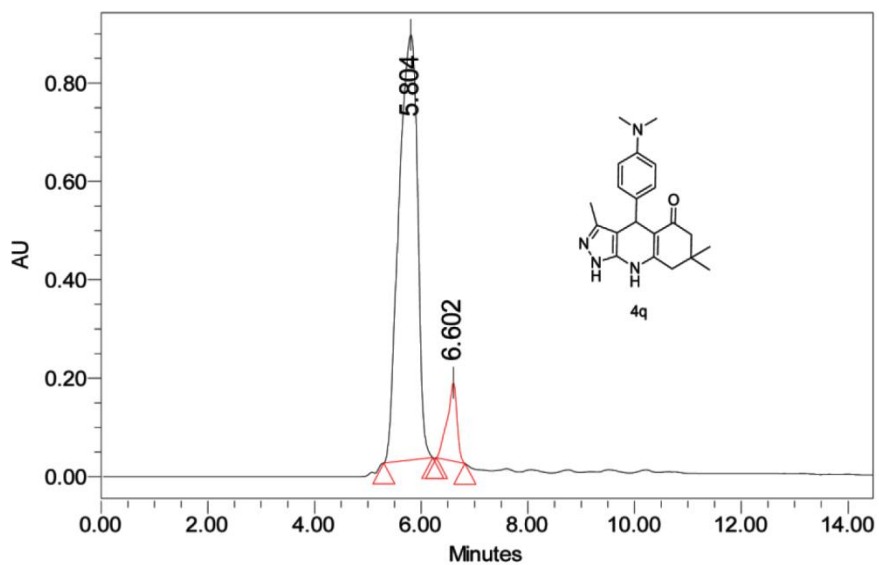

| Name | Retention Time | Area     | % Area | Height |
|------|----------------|----------|--------|--------|
| 1    | 5.804          | 20924403 | 91.08  | 864509 |
| 2    | 6.602          | 2049066  | 8.92   | 159696 |

Racemic Mixture:

Enantiomeric ratio (51.12:48.88) was determined by chiral HPLC analysis on AGELA CHIRAL ADV column, isopropanol: n- hexane (12: 88), flow 0.5 ml/min, UV 254 nm.

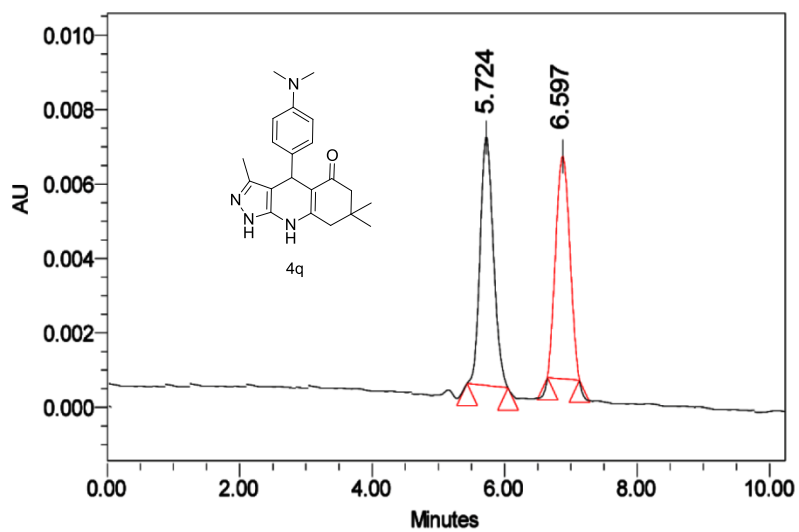

| Name | Retention Time | Area  | % Area | Height |
|------|----------------|-------|--------|--------|
| 1    | 5.724          | 92843 | 51.12  | 6694   |
| 2    | 6.597          | 88787 | 48.88  | 5989   |

Enantiomeric ratio (99.43:0.57) was determined by chiral HPLC analysis on AGELA CHIRAL ADV column, isopropanol: n- hexane (12: 88), flow 0.5 ml/min, UV 254 nm.

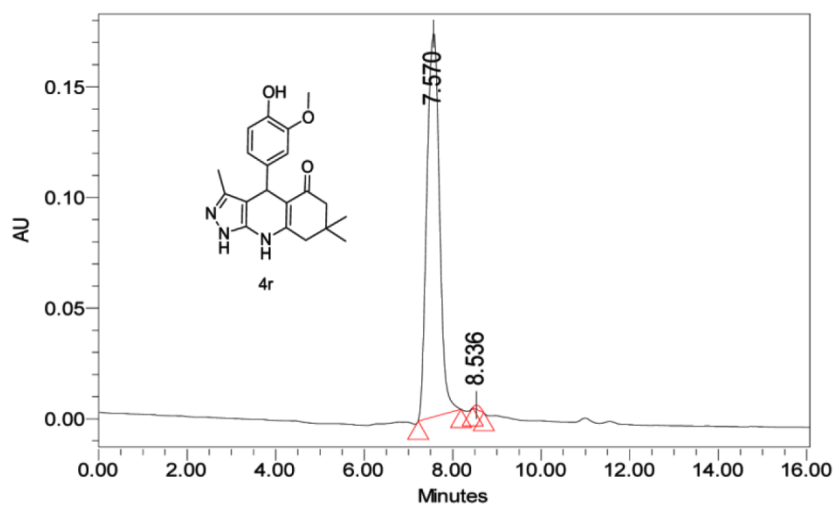

|   | Name | Retention Time | Area    | % Area | Height |
|---|------|----------------|---------|--------|--------|
| 1 |      | 7.570          | 3427626 | 99.43  | 173178 |
| 2 |      | 8.536          | 19807   | 0.57   | 1950   |

Racemic Mixture:

Enantiomeric ratio (55.37:44.63) was determined by chiral HPLC analysis on AGELA CHIRAL ADV column, isopropanol: n- hexane (12: 88), flow 0.5 ml/min, UV 254 nm.

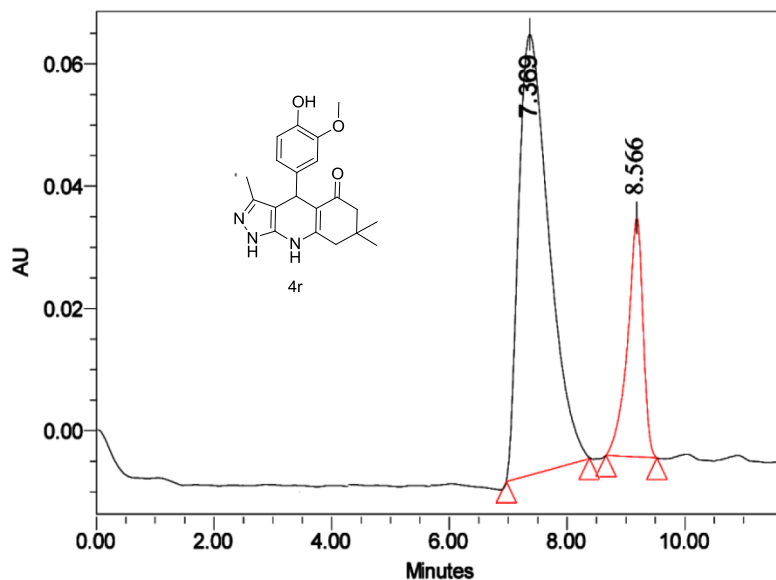

|   | Name | Retention Time | Area    | % Area | Height |
|---|------|----------------|---------|--------|--------|
| 1 |      | 7.369          | 2567094 | 55.37  | 72018  |
| 2 |      | 8.566          | 2069493 | 44.63  | 32584  |



Enantiomeric ratio (97.75:2.25) was determined by chiral HPLC analysis on AGELA CHIRAL ADV column, isopropanol: n- hexane (12: 88), flow 0.5 ml/min, UV 254 nm.

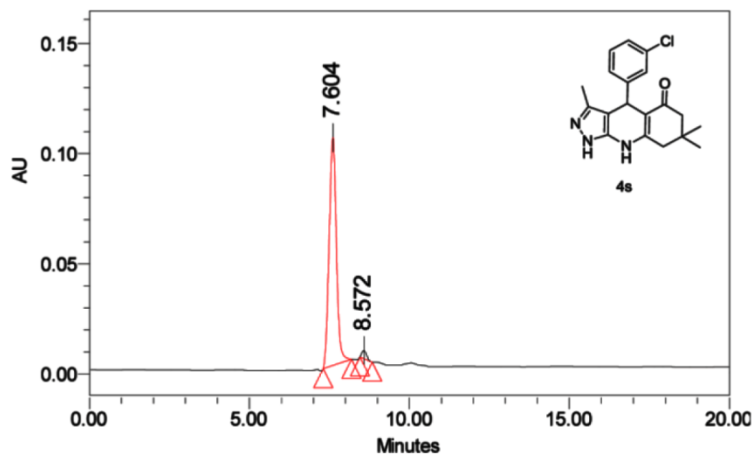

| Name | Retention Time | Area    | % Area | Height |
|------|----------------|---------|--------|--------|
| 1    | 7.604          | 1625621 | 97.75  | 103593 |
| 2    | 8.572          | 37345   | 2.25   | 3621   |

Racemic Mixture:

Enantiomeric ratio (49.28:50.72) was determined by chiral HPLC analysis on AGELA CHIRAL ADV column, isopropanol: n- hexane (12: 88), flow 0.5 ml/min, UV 254 nm.

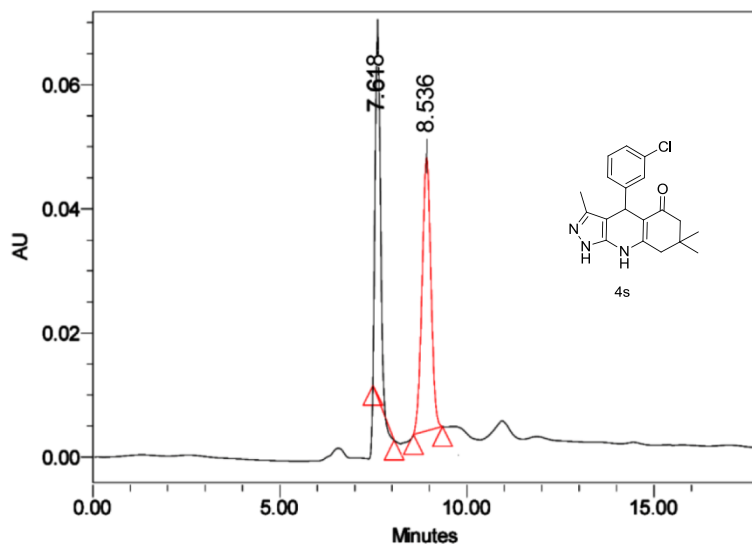

| Name | Retention Time | Area   | % Area | Height |
|------|----------------|--------|--------|--------|
| 1    | 7.618          | 579541 | 49.28  | 54877  |
| 2    | 8.536          | 596534 | 50.72  | 44734  |

Enantiomeric ratio (2.20:97.80) was determined by chiral HPLC analysis on AGELA CHIRAL ADV column, isopropanol: n- hexane (12: 88), flow 0.5 ml/min, UV 254 nm.

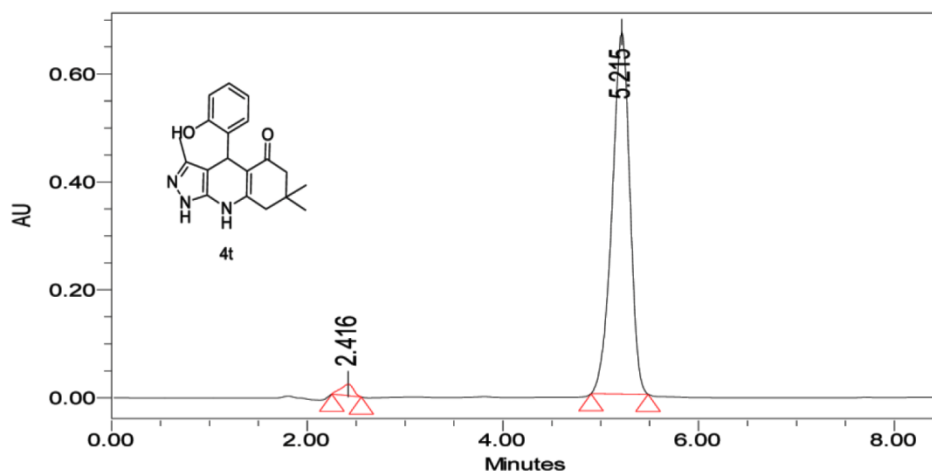

|   | Name | Retention Time | Area    | % Area | Height |
|---|------|----------------|---------|--------|--------|
| 1 |      | 2.416          | 191237  | 2.20   | 21313  |
| 2 |      | 5.215          | 8487866 | 97.80  | 671573 |

Racemic Mixture:

Enantiomeric ratio (49.18:50.82) was determined by chiral HPLC analysis on AGELA CHIRAL ADV column, isopropanol: n- hexane (12: 88), flow 0.5 ml/min, UV 254 nm.

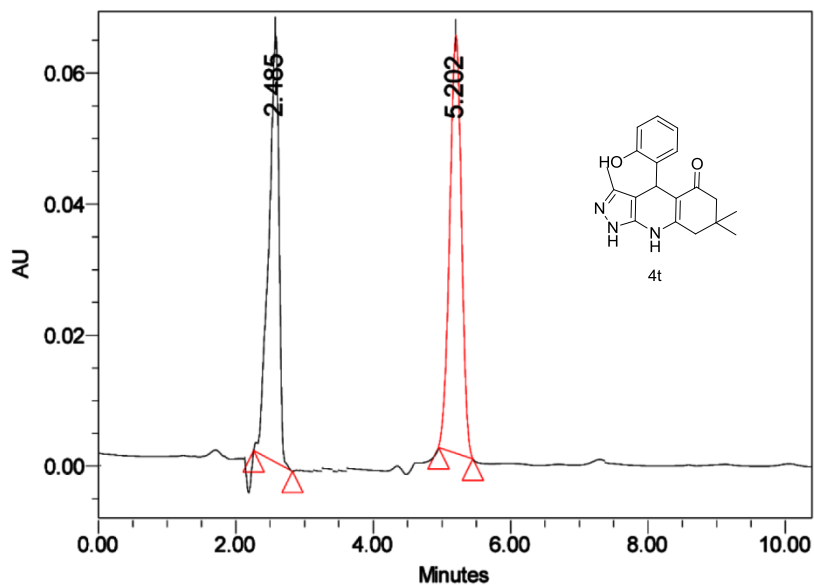

|   | Name | Retention Time | Area   | % Area | Height |
|---|------|----------------|--------|--------|--------|
| 1 |      | 2.485          | 125725 | 49.18  | 64650  |
| 2 |      | 5.202          | 129928 | 50.82  | 64105  |

Enantiomeric ratio (99.22:0.78) was determined by chiral HPLC analysis on AGELA CHIRAL ADV column, isopropanol: n- hexane (20: 80), flow 0.5 ml/min, UV 254 nm.

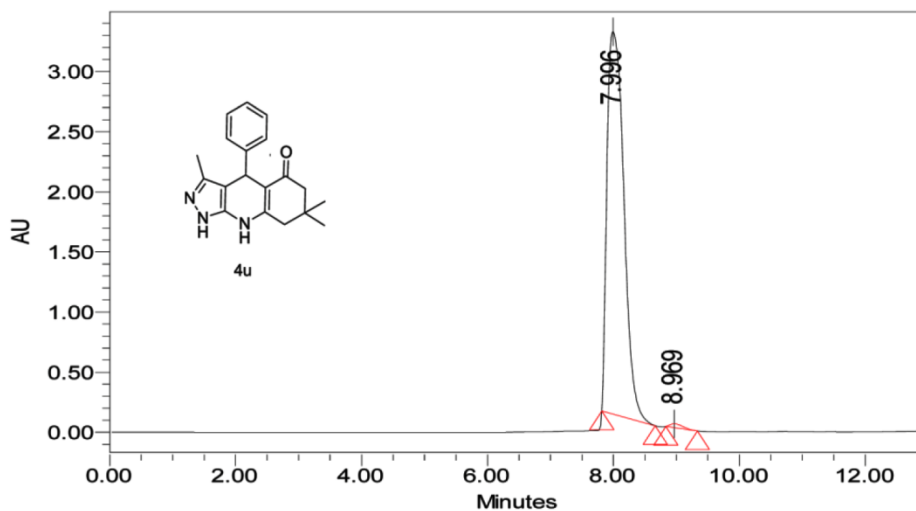

| Name | Retention Time | Area     | % Area | Height  |
|------|----------------|----------|--------|---------|
| 1    | 7.996          | 59097135 | 99.22  | 3179580 |
| 2    | 8.969          | 461814   | 0.78   | 32194   |

Racemic Mixture:

Enantiomeric ratio (48.05:51.95) was determined by chiral HPLC analysis on AGELA CHIRAL ADV column, isopropanol: n- hexane (20: 80), flow 0.5 ml/min, UV 254 nm.

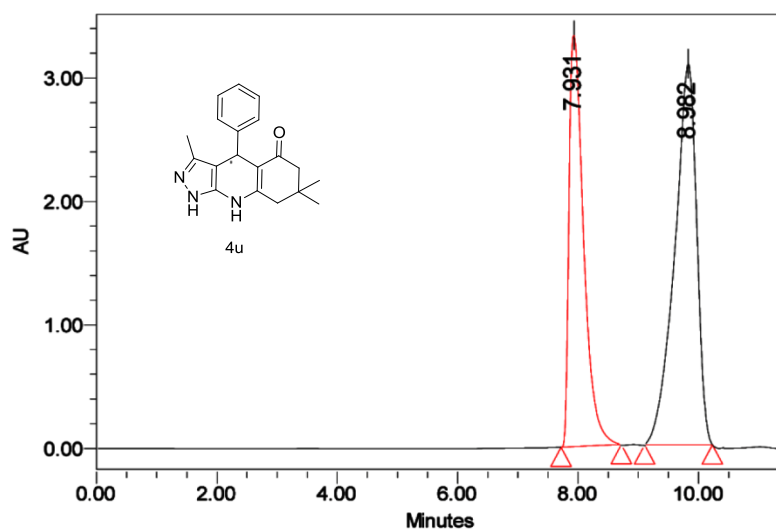

| Name | Retention Time | Area   | % Area | Height |
|------|----------------|--------|--------|--------|
| 1    | 7.931          | 792122 | 48.05  | 322276 |
| 2    | 8.982          | 856386 | 51.95  | 306114 |

## References:

1. J. Quiroga, D. Mejía, B. Insuasty, R. Abonía, M. Noguerras, A. Sánchez, J. Cobo, N. John, J. N. Low, *Tetrahedron* **2001**, *57*, 6947-6953.
2. D. Cannon, A. Quesada, J. Quiroga, D. Mejia, B. Insuasty, R. Abonia, J. Cobo, M. Noguerras, A. Sanchez, J.N. Low, *Acta Crystal. E* **2001**, *57*, o154-o156.
3. V. A. Chebanov, V. E. Saraev, S. M. Desenko, V. N. Chernenko, I. V. Knyazeva, U. Groth, T. N. Glasnov, C. O. Kappe, *J. Org. Chem.* **2008**, *73*, 5110-5118.
4. N. G. Singh, R. Nagarajaprakash, J. W. S. Rani, C. Kathing, R. Nongrum, R. Nongkhlaw *New J. Chem.* **2015**, *39*, 3908-3915.
